1 **The SARS-CoV-2 conserved macrodomain is a mono-ADP-ribosylhydrolase**

2  
3 Yousef M.O. Alhammad<sup>a</sup>, Maithri M. Kashipathy<sup>b</sup>, Anuradha Roy<sup>c</sup>, Jean-Philippe Gagné<sup>d,e</sup>,  
4 Peter McDonald<sup>c</sup>, Philip Gao<sup>f</sup>, Louis Nonfoux<sup>d,e</sup>, Kevin P. Battaile<sup>g</sup>, David K. Johnson<sup>h</sup>, Erik D.  
5 Holmstrom<sup>a</sup>, Guy G. Poirier<sup>d,e</sup>, Scott Lovell<sup>b</sup> and Anthony R. Fehr<sup>a,#</sup>

6 <sup>a</sup>Department of Molecular Biosciences, University of Kansas, Lawrence, Kansas 66045, USA

7 <sup>b</sup>Protein Structure Laboratory, University of Kansas, Lawrence, Kansas 66047, USA

8 <sup>c</sup>High Throughput Screening Laboratory, University of Kansas, Lawrence, Kansas 66047, USA

9 <sup>d</sup>Department of Molecular Biology, Medical Biochemistry and Pathology, Laval University

10 Cancer Research Center, Québec City, QC, G1V 0A6, Canada

11 <sup>e</sup>CHU de Québec Research Center, CHUL Pavilion, Oncology Division, Québec City, QC, G1V

12 4G2, Canada

13 <sup>f</sup>Protein Production Group, University of Kansas, Lawrence, Kansas 66047, USA

14 <sup>g</sup>NYX, New York Structural Biology Center, Upton, NY 11973, USA

15 <sup>h</sup>Molecular Graphics and Modeling Laboratory and the Computational Chemical Biology Core,  
16 University of Kansas, Lawrence, Kansas 66047, USA

17  
18 #Correspondence: arfehr@ku.edu; Tel.: +1- (785) 864-6626 (K.S.)

19  
20 Running title: SARS-CoV-2 Mac1 removes ADP-ribose from protein

21  
22 Keywords: Coronavirus, SARS-CoV-2, macrodomain, ADP-ribose, poly-ADP-ribose,

23 **ABSTRACT**

24 Severe acute respiratory syndrome coronavirus 2 (SARS-CoV-2) and other SARS-like-CoVs  
25 encode 3 tandem macrodomains within non-structural protein 3 (nsp3). The first macrodomain,  
26 Mac1, is conserved throughout CoVs, and binds to and hydrolyzes mono-ADP-ribose (MAR)  
27 from target proteins. Mac1 likely counters host-mediated anti-viral ADP-ribosylation, a  
28 posttranslational modification that is part of the host response to viral infections. Mac1 is  
29 essential for pathogenesis in multiple animal models of CoV infection, implicating it as a  
30 virulence factor and potential therapeutic target. Here we report the crystal structure of SARS-  
31 CoV-2 Mac1 in complex with ADP-ribose. SARS-CoV-2, SARS-CoV and MERS-CoV Mac1  
32 exhibit similar structural folds and all 3 proteins bound to ADP-ribose with low  $\mu\text{M}$  affinities.  
33 Importantly, using ADP-ribose detecting binding reagents in both a gel-based assay and novel  
34 ELISA assays, we demonstrated de-MARylating activity for all 3 CoV Mac1 proteins, with the  
35 SARS-CoV-2 Mac1 protein leading to a more rapid loss of substrate compared to the others. In  
36 addition, none of these enzymes could hydrolyze poly-ADP-ribose. We conclude that the SARS-  
37 CoV-2 and other CoV Mac1 proteins are MAR-hydrolases with similar functions, indicating that  
38 compounds targeting CoV Mac1 proteins may have broad anti-CoV activity.

39

40 **IMPORTANCE**

41 SARS-CoV-2 has recently emerged into the human population and has led to a worldwide  
42 pandemic of COVID-19 that has caused greater than 900 thousand deaths worldwide. With, no  
43 currently approved treatments, novel therapeutic strategies are desperately needed. All  
44 coronaviruses encode for a highly conserved macrodomain (Mac1) that binds to and removes  
45 ADP-ribose adducts from proteins in a dynamic post-translational process increasingly  
46 recognized as an important factor that regulates viral infection. The macrodomain is essential for  
47 CoV pathogenesis and may be a novel therapeutic target. Thus, understanding its biochemistry  
48 and enzyme activity are critical first steps for these efforts. Here we report the crystal structure of  
49 SARS-CoV-2 Mac1 in complex with ADP-ribose, and describe its ADP-ribose binding and  
50 hydrolysis activities in direct comparison to SARS-CoV and MERS-CoV Mac1 proteins. These  
51 results are an important first step for the design and testing of potential therapies targeting this  
52 unique protein domain.

53

## 54 INTRODUCTION

55 The recently emerged pandemic outbreak of COVID-19 is caused by a novel coronavirus  
56 named severe acute respiratory syndrome coronavirus 2 (SARS-CoV-2) (1, 2). As of September  
57 16, 2020, this virus has been responsible for ~ 30 million cases of COVID-19 and >900,000  
58 deaths worldwide. SARS-CoV-2 is a member of the lineage B  $\beta$ -CoVs with overall high  
59 sequence similarity with other SARS-like CoVs, including SARS-CoV. While most of the  
60 genome is >80% similar with SARS-CoV, there are regions where amino acid conservation is  
61 significantly lower. As expected, the most divergent proteins in the SARS-CoV-2 genome from  
62 SARS-CoV include the Spike glycoprotein and several accessory proteins including 8a (absent),  
63 8b (extended), and 3b (truncated). However, somewhat unexpectedly, several non-structural  
64 proteins also show significant divergence from SARS-CoV, including non-structural proteins 3,  
65 4, and 7, which could affect the biology of SARS-CoV-2 (3, 4).

66 Coronaviruses encode 16 non-structural proteins that are translated from two open  
67 reading frames (ORFs), replicase 1a and 1b (rep1a and rep1ab) (5). The largest non-structural  
68 protein is the non-structural protein 3 (nsp3) that encodes for multiple modular protein domains.  
69 These domains in SARS-CoV-2 diverge in amino acid sequence from SARS-CoV as much as  
70 30%, and SARS-CoV-2 nsp3 includes a large insertion of 25-41 residues just upstream of the  
71 first of three tandem macrodomains (Mac1, Mac2, and Mac3) (Fig. 1A) (3). In addition to this  
72 insertion, the individual macrodomains show large amounts of amino acid divergence. Mac1  
73 diverges 28% from SARS-CoV and 59% from MERS-CoV, while Mac2 and Mac3 diverge 24%  
74 from SARS-CoV. It is feasible that these significant sequence differences could impact the  
75 unique biology of SARS-CoV-2. However, macrodomains have a highly conserved structure,  
76 and thus sequence divergence may have little impact on their overall function. Mac1 is present in

77 all CoVs, unlike Mac2 and Mac3, and early structural and biochemical data demonstrated that it  
78 contains a conserved three-layered  $\alpha/\beta/\alpha$  fold and binds to mono-ADP-ribose (MAR) and other  
79 related molecules (6-10). This is unlike Mac2 and Mac3, which fail to bind ADP-ribose and  
80 instead appear to bind to nucleic acids (11, 12). ADP-ribose is buried in a hydrophobic cleft of  
81 Mac1 where the ADP-ribose binds to several highly-conserved residues such as aspartic acid at  
82 position 23 (D23) and asparagine at position 41 (N41) of SARS-CoV (Fig. 1B) (6). Mac1  
83 homologs are also found in alphaviruses, Hepatitis E virus, and Rubella virus, and structural  
84 analysis of these macrodomains have demonstrated that they are very similar to CoV Mac1 (13,  
85 14). All are members of the larger MacroD-type macrodomain family, which includes human  
86 macrodomains Mdo1 and Mdo2 (15).

87 The CoV Mac1 was originally named ADP-ribose-1''-phosphatase (ADRP) based on data  
88 demonstrating that it could remove the phosphate group from ADP-ribose-1''-phosphate (6-8).  
89 However, the activity was rather modest, and it was unclear why this would impact a virus  
90 infection. More recently it has been demonstrated that CoV Mac1 can hydrolyze the bond  
91 between amino acid chains and ADP-ribose molecules (16-18), indicating that it can reverse  
92 protein ADP-ribosylation (6, 8). ADP-ribosylation is a post-translational modification catalyzed  
93 by ADP-ribosyltransferases (ARTs, also known as PARPs) through transferring an ADP-ribose  
94 moiety from NAD<sup>+</sup> onto target proteins (19). The ADP-ribose is transferred as a single unit of  
95 MAR, or single units of MAR are transferred consecutively to form a PAR chain. Several Mac1  
96 proteins have been shown to hydrolyze MAR, but have minimal activity towards PAR (16, 17).  
97 Several MARYlating PARPs are induced by interferon (IFN) and are known to inhibit virus  
98 replication, implicating MARYlation in the host-response to infection (20).

99           Several reports have addressed the role of Mac1 on the replication and pathogenesis of  
100 CoVs, mostly using the mutation of a highly conserved asparagine to alanine (N41A-SARS-  
101 CoV). This mutation abolished the MAR-hydrolase activity of SARS-CoV Mac1 (18). This  
102 mutation has minimal effects on CoV replication in transformed cells, but reduces viral load,  
103 leads to enhanced IFN production, and strongly attenuates both murine hepatitis virus (MHV)  
104 and SARS-CoV in mouse models of infection (7, 18, 21, 22). MHV Mac1 was also required for  
105 efficient replication in primary macrophages, which could be partially rescued by the PARP  
106 inhibitors XAV-939 and 3-AB or siRNA knockdown of PARP12 or PARP14 (23). These data  
107 suggest that Mac1's likely function is to counter PARP-mediated anti-viral ADP-ribosylation  
108 (24). Mutations in the alphavirus and HEV macrodomain also have substantial phenotypic  
109 effects on virus replication and pathogenesis (16, 25-28). As viral macrodomains are clearly  
110 important virulence factors, they are considered to be potential targets for anti-viral therapeutics  
111 (24).

112           Based on the close structural similarities between viral macrodomains, we hypothesized  
113 that SARS-CoV-2 Mac1 has similar binding and hydrolysis activity as other CoV Mac1  
114 enzymes. In this study, we determined the crystal structure of the SARS-CoV-2 Mac1 protein  
115 bound to ADP-ribose. Binding to and hydrolysis of MAR was tested and directly compared to a  
116 human macrodomain (Mdo2) and the SARS-CoV and MERS-CoV Mac1 proteins by several *in*  
117 *vitro* assays. All CoV Mac1 proteins bound to MAR and could remove MAR from a protein  
118 substrate. However, the initial rate associated with the loss of substrate was largest for the  
119 SARS-CoV-2 Mac1 protein, especially under multi-turnover conditions. In addition, none of  
120 these enzymes could remove PAR from a protein substrate. These results indicate that Mac1

121 protein domains likely have similar functions, and will be instrumental in the design and testing  
122 of novel therapeutic agents targeting the CoV Mac1 protein domain.

123

124 **RESULTS**

125 **Structure of the SARS-CoV-2 Mac1 complexed with ADP-ribose.** To create recombinant  
126 SARS-CoV-2 Mac1 for structure determination and enzyme assays, nucleotides 3348-3872 of  
127 SARS-CoV-2 isolate Wuhan-hu-1 (accession number NC\_045512), representing amino acids  
128 I1023-K1197 of repla, were cloned into a bacterial expression vector containing an N-terminal  
129 6X-His tag and TEV cleavage site. We obtained large amounts (>100 mg) of purified  
130 recombinant protein (Fig. S1A). A small amount of this protein was digested by the TEV  
131 protease to obtain protein devoid of any extra tags for crystallization and used to obtain crystals  
132 from which the structure was determined (Fig. S1B). Our crystallization experiments resulted in  
133 the same crystal form (needle clusters) from several conditions, but only when ADP-ribose was  
134 added to the protein. This represents an additional crystal form ( $P2_1$ ) amongst the recently  
135 determined SARS-CoV-2 macrodomain structures (29-31).

136 The structure of SARS-CoV-2 Mac1 complexed with ADP-ribose was obtained using X-  
137 ray diffraction data to 2.2 Å resolution and contained four molecules in the asymmetric unit that  
138 were nearly identical. The polypeptide chains could be traced from V3-M171 for subunits A/C  
139 and V3-K172 for subunits B/D. Superposition of subunits B-D onto subunit A (169 residues  
140 aligned) yielded RMSD deviations of 0.17 Å, 0.17 Å and 0.18 Å respectively between  $C\alpha$  atoms.  
141 As such, subunit A was used for the majority of the structure analysis described herein. The  
142 SARS-CoV-2 Mac1 protein adopted a fold consistent with the MacroD sub-family of  
143 macrodomains that contains a core composed of a mixed arrangement of 7  $\beta$ -sheets (parallel and  
144 antiparallel) that are flanked by 6  $\alpha$ -helices (Fig. 2A-B).

145 As mentioned above, apo crystals were never observed for our construct, though the apo  
146 structure has been solved by researchers at The Center for Structural Genomics of Infectious



147 Diseases (PDB 6WEN) (30) and the University of Wisconsin-Milwaukee (PDB 6WEY) (32).  
148 Further analysis of the amino acid sequences used for expression and purification revealed that  
149 our construct had 5 additional residues at the C-terminus (MKSEK) and differs slightly at the N-  
150 terminus as well (GIE vs GE) relative to 6WEN. In addition, the sequence used to obtain the  
151 structure of 6WEY is slightly shorter than SARS-CoV-2 Mac1 at both the N and C-terminal  
152 regions (Fig. S2A). To assess the effect of these additional residues on crystallization, chain B  
153 of the SARS-CoV-2 Mac1, which was traced to residue K172, was superimposed onto subunit A  
154 of PDB 6W02 (31), a previously determined structure of ADP-ribose bound SARS-CoV-2 Mac1.  
155 Analysis of the crystal packing of 6W02 indicates that the additional residues at the C-terminus  
156 would clash with symmetry related molecules (Fig. S2B). This suggests that the presence of  
157 these extra residues at the C-terminus likely prevented the generation of the more tightly packed  
158 crystal forms obtained for 6W02 and 6WEY, which diffracted to high resolution.

159         The ADP-ribose binding pocket contained large regions of positive electron density  
160 consistent with the docking of ADP-ribose (Fig. 3A). The adenine forms two hydrogen bonds  
161 with D22-I23, which makes up a small loop between  $\beta 2$  and the N-terminal half of  $\alpha 1$ . The side  
162 chain of D22 interacts with N6, while the backbone nitrogen atom of I23 interacts with N1, in a  
163 very similar fashion to the SARS-CoV macrodomain (6). This aspartic acid is known to be  
164 critical for ADP-ribose binding for alphavirus macrodomains (26, 27). A large number of  
165 contacts are made in the highly conserved loop between  $\beta 3$  and  $\alpha 2$  which includes many highly-  
166 conserved residues, including a GGG (motif) and N40, which is completely conserved in all  
167 enzymatically active macrodomains (33). N40 is positioned to make hydrogen bonds with the 3'  
168 OH groups of the distal ribose, as well as a conserved water molecule (Fig. 3B-C). K44 and G46  
169 also make hydrogen bonds with the 2' OH of the distal ribose, G48 makes contact with the 1'

170 OH and a water that resides near the catalytic site, while the backbone nitrogen atom of V49  
171 hydrogen bonds with the  $\alpha$ -phosphate. The other major interactions with ADP-ribose occur in  
172 another highly conserved region consisting of residues G130, I131, and F132 that are in the loop  
173 between  $\beta$ 6 and  $\alpha$ 5 (Fig. 3B). The  $\alpha$ -phosphate accepts a hydrogen bond from the nitrogen atom  
174 of I131, while the  $\beta$ -phosphate accepts hydrogen bonds from the backbone nitrogen atom of  
175 G130 and F132. The phenyl ring of F132 may make van der Waals interactions with the distal  
176 ribose to stabilize it, which may contribute to binding and hydrolysis (34). Loops  $\beta$ 3- $\alpha$ 2 and  $\beta$ 6-  
177  $\alpha$ 5 are connected by an isoleucine bridge that forms a narrow channel around the diphosphate  
178 which helps position the terminal ribose for water-mediated catalysis (6). Of all these residues, is  
179 not exactly clear which ones are important for ADP-ribose binding, hydrolysis, or both.  
180 Additionally, a network of direct contacts of ADP-ribose to solvent along with water mediated  
181 contacts to the protein are shown (Fig. 3C).

182 **Comparison of SARS-CoV-2 Mac1 with other CoV macrodomain structures.** We  
183 next sought to compare the SARS-CoV-2 Mac1 to other deposited structures of this protein.  
184 Superposition with Apo (6WEN) and ADP-ribose complexed protein (6W02) yielded RMSD of  
185 0.48 Å (168 residues) and 0.37 Å (165 residues), respectively, indicating a high degree of  
186 similarity (Fig. S3A-B). Comparison of the ADP-ribose binding site of SARS-CoV-2 Mac1 with  
187 that of the apo structure (6WEN) revealed minor conformational differences in order to  
188 accommodate ADP-ribose binding. The loop between  $\beta$ 3 and  $\alpha$ 2 (H45-V49) undergoes a change  
189 in conformation and the sidechain of F132 is moved out of the ADP-ribose binding site (Fig.  
190 S3C). Our ADP-ribose bound structure is nearly identical to 6W02, except for slight deviations  
191 in the  $\beta$ 3- $\alpha$ 2 loop and an altered conformation of F156, where the aryl ring of F156 is moved  
192 closer to the adenine ring (Fig. S3 C-D). However, this is likely a result of crystal packing as

193 F156 adopts this conformation in each subunit and would likely clash with subunit residues  
194 related by either crystallographic or non-crystallographic symmetry.

195 We next compared the ADP-ribose bound SARS-CoV-2 Mac1 structure with that of  
196 SARS-CoV (PDB 2FAV) (6) and MERS-CoV (PDB 5HOL) (35) Mac1 proteins. Superposition  
197 yielded RMSD deviations of 0.71 Å (166 residues) and 1.06 Å (161 residues) for 2FAV and  
198 5HOL, respectively. Additionally, the ADP-ribose binding mode in the SARS-CoV and SARS-  
199 CoV-2 structures almost perfectly superimposed (Fig. 4A-D). The conserved aspartic acid  
200 residue (D22, SARS-CoV-2) that binds to adenine, is localized in a similar region in all 3  
201 proteins although there are slight differences in the rotamers about the C $\beta$ -C $\gamma$  bond. The angles  
202 between the mean planes defined by the OD1, CG and OD2 atoms relative to SARS-CoV-2  
203 Mac1 is 23.1° and 46.5° for the SARS-CoV and MERS-CoV Mac1 structures, respectively.  
204 Another notable difference is that SARS-CoV and SARS-CoV-2 macrodomains have an  
205 isoleucine (I23) following this aspartic acid while MERS-CoV has an alanine (A22). Conversely,  
206 SARS-CoV-2 and SARS-CoV Mac1 have a valine instead of an isoleucine immediately  
207 following the GGG motif (V49/I48). From these structures it appears that having two isoleucines  
208 in this location would clash, and that lineage B and lineage C  $\beta$ -CoVs has evolved in unique  
209 ways to create space in this pocket (Fig. 4D and data not shown). Despite these small differences  
210 in local structure, the overall structure of CoV Mac1 domains remain remarkably conserved, and  
211 indicates they likely have similar biochemical activities and biological functions.

212 **SARS-CoV, SARS-CoV-2, and MERS-CoV bind to ADP-ribose with similar**  
213 **affinities.** To determine if the CoV macrodomains had any noticeable differences in their ability  
214 to bind ADP-ribose, we performed isothermal titration calorimetry (ITC), which measures the  
215 energy released or absorbed during a binding reaction. Macrodomain proteins from human

216 (Mdo2), SARS-CoV, MERS-CoV, and SARS-CoV-2 were purified (Fig. S1A) and tested for  
217 their affinity to ADP-ribose. All CoV Mac1 proteins bound to ADP-ribose with low micromolar  
218 affinity (7-16  $\mu$ M), while human Mdo2 bound with an affinity about 10-times stronger ( $\sim$ 220  
219 nM) (Fig. 5A-B). As a control we tested the ability of the MERS-CoV macrodomain to bind to  
220 ATP, and only observed minimal binding with mM affinity (data not shown). At higher  
221 concentrations, the SARS-CoV-2 macrodomain caused a slightly endothermic reaction,  
222 potentially the result of protein aggregation or a change in conformation (Fig. 5A). The MERS-  
223 CoV Mac1 had a greater affinity for ADP-ribose than SARS-CoV or SARS-CoV-2 Mac1 in the  
224 ITC assay (Fig. 5A-B), however, our results found the differences between these macrodomain  
225 proteins to be much closer than previously reported (9). As an alternate method to confirm ADP-  
226 ribose binding, we conducted a thermal shift assay. All 4 macrodomains tested denatured at  
227 higher temperatures with the addition of ADP-ribose (Fig. S4). We conclude that lineage B and  
228 lineage C  $\beta$ -CoV Mac1 proteins bind to ADP-ribose with similar affinities.

229 **CoV macrodomains are MAR-hydrolases.** To examine the MAR-hydrolase activity of  
230 CoV Mac1, we first tested the viability of using ADP-ribose binding reagents to detect  
231 MARylated protein. Previously, radiolabeled NAD<sup>+</sup> has been the primary method used to label  
232 MARylated protein (16, 17). To create a MARylated substrate, the catalytic domain of the  
233 PARP10 (GST-PARP10 CD) protein was incubated with NAD<sup>+</sup>, leading to its automodification.  
234 PARP10 CD is a standard substrate that has been used extensively in the field to analyze the  
235 activity of macrodomains (16, 18, 26, 27). PARP10 is highly upregulated upon CoV infection  
236 (23, 36) and is known to primarily auto-MARylate itself on acidic residues, which are the targets  
237 of the MacroD2 class of macrodomains (27). We then tested a panel of anti-MAR, anti-PAR, or  
238 both anti-MAR and anti-PAR binding reagents/antibodies for the ability to detect MARylated

239 PARP10 by immunoblot. The anti-MAR and anti-MAR/PAR binding reagents, but not anti-PAR  
240 antibody, bound to MARYlated PARP10 (Fig. S5). Therefore, in this work we utilized the anti-  
241 MAR binding reagent to detect MARYlated PARP10.

242 We next tested the ability of SARS-CoV-2 Mac1 to remove ADP-ribose from  
243 MARYlated PARP10. SARS-CoV-2 Mac1 and MARYlated PARP10 were incubated at  
244 equimolar amounts of protein at 37°C and the reaction was stopped at 5, 10, 20, 30, 45 or 60  
245 minutes (Fig. 6A). As a control, MARYlated PARP10 was incubated alone at 37°C and collected  
246 at similar time points (Fig. 6A and Fig. S6). Each reaction had equivalent amounts of  
247 MARYlated PARP10 and Mac1 which was confirmed by Coomassie Blue staining (Fig. 6A). An  
248 immediate reduction of more than 50% band intensity was observed within five minutes, and the  
249 ADP-ribose modification was nearly completely removed by SARS-CoV-2 Mac1 within 30  
250 minutes (Fig. 6A). The MARYlated PAPR10 bands intensities were calculated, plotted, and were  
251 fit using non-linear regression (Fig. 6B). This result indicates that the SARS-CoV-2 Mac1  
252 protein is a mono-ADP-ribosylhydrolase enzyme.

253 Next, we compared the MAR-hydrolase activity of Mac1 proteins from SARS-CoV-2,  
254 SARS-CoV, and MERS-CoV and human (i.e., Mdo2). Specifically, we monitored the time-  
255 dependent loss of substrate using immunoblotting (Fig. 6C) under equimolar (i.e., 1  $\mu$ M  
256 [Mac1]:1  $\mu$ M [substrate]) and multiple-turnover conditions (i.e., 0.5  $\mu$ M [substrate]:0.1  $\mu$ M  
257 [Mac1] and 1.0  $\mu$ M [substrate]:0.1  $\mu$ M [Mac1] ), with total protein amounts confirmed by  
258 Coomassie blue staining (Fig. S7). The resulting substrate decay plots (Fig. 6D) were fit using  
259 non-linear regression to determine the initial rate ( $k$ ) of substrate decay. Our results indicate that  
260 the three CoV Mac1 proteins give rise to similar, but not identical, values of  $k$  (Fig. 6D). The  
261 SARS-CoV-2 Mac1 protein has a greater  $k$  than the SARS-CoV or MERS-CoV Mac1 proteins,

262 especially under multiple-turnover conditions, and all 3 viral macrodomains gave rise to a more  
263 rapid loss of substrate than the human Mdo2 enzyme (Fig. 6F). However, further enzymatic  
264 analyses of these proteins are warranted to more thoroughly understand their kinetics and  
265 binding affinities associated with various MARYlated substrates.

266 **CoV Mac1 proteins do not hydrolyze PAR.** To determine if the CoV Mac1 proteins  
267 could remove PAR from proteins, we incubated these proteins with an auto-PARYlated PARP1  
268 protein. PARP1 was incubated with increasing concentrations of NAD<sup>+</sup> to create a range of  
269 modification levels (Fig. S8). We incubated both partially and heavily modified PARP1 with all  
270 four macrodomains and PARG as a positive control for 1 hour. While PARG completely  
271 removed PAR, none of the macrodomain proteins removed PAR chains from PARP1 (Fig. 7).  
272 We conclude that macrodomain proteins are unable to remove PAR from an automodified  
273 PARP1 protein under these conditions.

274 **ELISA assays can be used to measure ADP-ribosylhydrolase activity of**  
275 **macrodomains.** Gel based assays as described above suffer from significant limitations in the  
276 number of samples that can be done at once. A higher throughput assay will be needed to more  
277 thoroughly investigate the activity of these enzymes and to screen for inhibitor compounds.  
278 Based on the success of our antibody-based detection of MAR, we developed an ELISA assay  
279 that has a similar ability to detect de-MARYlation as our gel-based assay, but with the ability to  
280 do so in a higher throughput manner (Fig. 8A). First, MARYlated PARP10 was added to ELISA  
281 plates. Next, the wells were washed and then incubated with different concentrations of the  
282 SARS-CoV-2 Mac1 protein for 60 min. After incubation, the wells were washed and treated with  
283 anti-MAR binding reagent, followed by HRP-conjugated secondary antibody and the detection  
284 reagent. As controls, we detected MARYlated and non-MARYlated PARP10 proteins bound to

285 glutathione plates with anti-GST antibody and anti-MAR binding reagents and their  
286 corresponding secondary antibodies (Fig. 8B). SARS-CoV-2 Mac1 was able to remove MAR  
287 signal in a dose-dependent manner and plotted to a linear non-regression fitted line (Fig. 8C).  
288 Based on these results, we believe that this ELISA assay will be a useful tool for screening  
289 potential inhibitors of macrodomain proteins.

## 290 **DISCUSSION**

291 Here we report the crystal structure of SARS-CoV-2 Mac1 and its enzyme activity *in*  
292 *vitro*. Structurally, it has a conserved three-layered  $\alpha/\beta/\alpha$  fold typical of the MacroD family of  
293 macrodomains, and is extremely similar to other CoV Mac1 proteins (Fig. 2-4). The conserved  
294 CoV macrodomain (Mac1) was initially described as an ADP-ribose-1''-phosphatase (ADRP), as  
295 it was shown to be structurally similar to yeast enzymes that have this enzymatic activity (37).  
296 Early biochemical studies confirmed this activity for CoV Mac1, though its phosphatase activity  
297 for ADP-ribose-1''-phosphate was rather modest (6-8). Later, it was shown that mammalian  
298 macrodomain proteins could remove ADP-ribose from protein substrates, indicating protein de-  
299 ADP-ribosylation as a more likely function for the viral macrodomains (33, 38, 39). Shortly  
300 thereafter, the SARS-CoV, hCoV-229E, FIPV, several alphavirus, and the hepatitis E virus  
301 macrodomains were demonstrated to have de-ADP-ribosylating activity (16-18). However, this  
302 activity has not yet been reported for the MERS-CoV or SARS-CoV-2 Mac1 protein.

303 In this study, we show that the Mac1 proteins from SARS-CoV, MERS-CoV and SARS-  
304 CoV-2 hydrolyze MAR from a protein substrate (Fig. 6). Their enzymatic activities were similar  
305 despite sequence divergence of almost 60% between SARS-CoV-2 and MERS-CoV. However,  
306 the initial rate associated with the loss of substrate was largest for the SARS-CoV-2 Mac1  
307 protein, particularly under multiple-turnover conditions. It is unclear what structural or sequence  
308 differences may account for the increased activity of the SARS-CoV-2 Mac1 protein under these  
309 conditions, especially considering the pronounced structural similarities between these  
310 proteins, specifically the SARS-CoV Mac1 (0.71 Å RMSD). It is also unclear if these differences  
311 would matter in the context of the virus infection, as the relative concentrations of Mac1 and its  
312 substrate during infection is not known. We also compared these activities to the human Mdo2



313 macrodomain. Mdo2 had a greater affinity for ADP-ribose than the viral enzymes, but had  
314 significantly reduced enzyme activity in our experiments. Due to its high affinity for ADP-  
315 ribose, it is possible that the Mdo2 protein was partially inhibited by rebinding to the MAR  
316 product in these assays. Regardless, these results suggest that the human and viral proteins likely  
317 have structural differences that alter their biochemical activities *in vitro*, indicating that it may be  
318 possible to create viral macrodomain inhibitors that don't impact the human macrodomains. We  
319 also compared the ability of these macrodomain proteins to hydrolyze PAR. None of the  
320 macrodomains were able to hydrolyze either partially or heavily modified PARP1, further  
321 demonstrating that the primary enzymatic activity of these proteins is to hydrolyze MAR (Fig.  
322 7).

323         When analyzing viral macrodomain sequences, it is clear that they have at least 3 highly  
324 conserved regions (Fig. 1B)(24). The first region includes the NAAN (37-40) and GGG (residues  
325 46-48) motifs in the loop between  $\beta$ 3 and  $\alpha$ 2. The second domain includes a GIF (residues 130-  
326 132) motif in the loop between  $\beta$ 6 and  $\alpha$ 5. The final conserved region is a VGP (residues 96-98)  
327 motif at the end of  $\beta$ 5 and extends into the loop between  $\beta$ 5 and  $\alpha$ 4. Both of the first two  
328 domains have well defined interactions with ADP-ribose (Fig. 3). However, no one has  
329 addressed the role of the VGP residues, though our structure indicates that the glycine may  
330 interact with a water molecule that makes contact with the  $\beta$ -phosphate. Identifying residues that  
331 directly contribute to ADP-ribose binding, hydrolysis, or both by CoV Mac1 proteins will be  
332 critical to determining the specific roles of ADP-ribose binding and hydrolysis in CoV  
333 replication and pathogenesis.

334         While all previous studies of macrodomain de-ADP-ribosylation have primarily used  
335 radiolabeled substrate, we obtained highly repeatable and robust data utilizing ADP-ribose

336 binding reagents designed to specifically recognize MAR (40, 41). The use of these binding  
337 reagents should enhance the feasibility of this assay for many labs that are not equipped for  
338 radioactive work. Utilizing these binding reagents, we further developed an ELISA assay for de-  
339 MARYlation that has the ability to dramatically increase the number of samples that can be  
340 analyzed compared to the gel-based assay. To our knowledge, previously developed ELISA  
341 assays were used to measure ADP-ribosyltransferase activities (42) but no ELISA has been  
342 established to test the ADP-ribosylhydrolase activity of macrodomain proteins. This ELISA  
343 assay should be useful to those in the field to screen compounds for macrodomain inhibitors that  
344 could be either valuable research tools or potential therapeutics.

345         The functional importance of the CoV Mac1 domain has been demonstrated in several  
346 reports, mostly utilizing the mutation of a highly conserved asparagine that mediates contact with  
347 the distal ribose (Fig. 3B) (18, 21, 22). However, the physiological relevance of Mac1 during  
348 SARS-CoV-2 infection has yet to be determined. In addition, the proteins that are targeted by the  
349 CoV Mac1 for de-ADP-ribosylation remains unknown. Unfortunately, there are no known  
350 compounds that inhibit this domain that could help identify the functions of this protein during  
351 infection. The outbreak of COVID-19 has illustrated an urgent need for developing multiple  
352 therapeutic drugs targeting conserved coronavirus proteins. Mac1 appears to be an ideal  
353 candidate for further drug development based on: *i*) its highly conserved structure and  
354 biochemical activities within CoVs; and *ii*) its importance for multiple CoVs to cause disease.  
355 Targeting Mac1 may also have the benefit of enhancing the innate immune response, as we have  
356 shown that Mac1 is required for some CoVs to block IFN production (18, 23). Considering that  
357 Mac1 proteins from divergent  $\alpha$ CoVs such as 229E and FIPV also have de-ADP-ribosylating  
358 activity (16, 17), it is possible that compounds targeting Mac1 could prevent disease caused by

359 of wide variety of CoV, including those of veterinary importance like porcine epidemic diarrhea  
360 virus (PEDV). Additionally, compounds that inhibit Mac1 in combination with the structure  
361 could help identify the mechanisms it uses to bind to its biologically relevant protein substrates,  
362 remove ADP-ribose from these proteins, and potentially define the precise function for Mac1 in  
363 SARS-CoV-2 replication and pathogenesis. In conclusion, the results described here will be  
364 critical for the design and development of highly-specific Mac1 inhibitors that could be used  
365 therapeutically to mitigate COVID-19 or future CoV outbreaks.  
366

## 367 **METHODS**

### 368 **Plasmids**

369           The SARS-CoV macrodomain (Mac1) (residues 1000-1172 of pp1a) was cloned into the  
370 pET21a+ expression vector with an N-terminal His tag. The MERS-CoV Mac1 (residues 1110-  
371 1273 of pp1a) was also cloned into pET21a+ with a C-terminal His tag. SARS-CoV-2 Mac1  
372 (residues 1023-1197 of pp1a) was cloned into the pET30a+ expression vector with an N-terminal  
373 His tag and a TEV cleavage site (Synbio). The pETM-CN Mdo2 Mac1 (residues 7-243)  
374 expression vector with an N-terminal His-TEV-V5 tag and the pGEX4T-PARP10-CD (residues  
375 818-1025) expression vector with an N-terminal GST tag were previously described (33). All  
376 plasmids were confirmed by restriction digest, PCR, and direct sequencing.

### 377 **Protein Expression and Purification**

378           A single colony of *E. coli* cells (C41(DE3)) containing plasmids harboring the constructs  
379 of the macrodomain proteins was inoculated into 10 mL LB media and grown overnight at 37°C  
380 with shaking at 250 rpm. The overnight culture was transferred to a shaker flask containing 2X  
381 1L TB media at 37°C until the OD600 reached 0.7. The proteins were either induced with 0.4  
382 mM IPTG at 37°C for 3 hours, or 17°C for 20 hours. Cells were pelleted at 3500 × g for 10 min  
383 and frozen at -80°C. Frozen cells were thawed at room temperature, resuspended in 50 mM Tris  
384 (pH 7.6), 150 mM NaCl, and sonicated using the following cycle parameters: Amplitude: 50%,  
385 Pulse length: 30 seconds, Number of pulses: 12, while incubating on ice for >1min between  
386 pulses. The soluble fraction was obtained by centrifuging the cell lysate at 45,450 × g for 30  
387 minutes at 4°C. The expressed soluble proteins were purified by affinity chromatography using  
388 a 5 ml prepacked HisTrap HP column on an AKTA Pure protein purification system (GE  
389 Healthcare). The fractions were further purified by size-exclusion chromatography (SEC) with a

390 Superdex 75 10/300 GL column equilibrated with 20mM Tris (pH 8.0), 150 mM NaCl and the  
391 protein sized as a monomer relative to the column calibration standards. To cleave off the His tag  
392 from the SARS-CoV-2 Mac1, purified TEV protease was added to purified SARS-CoV-2 Mac1  
393 protein at a ratio of 1:10 (w/w), and then passed back through the Ni-NTA HP column. Protein  
394 was collected in the flow through and equilibrated with 20 mM Tris (pH 8.0), 150 mM NaCl.  
395 The SARS-CoV-2 Mac1, free from the N-terminal 6X-His tag, was used for subsequent  
396 crystallization experiments.

397 For the PARP10-CD protein, the cell pellet was resuspended in 50 mM Tris-HCl (pH  
398 8.0), 500 mM NaCl, 0.1mM EDTA, 25% glycerol, 1 mM DTT and sonicated as described above.  
399 The cell lysate was incubated with 10 ml of Glutathione Sepharose 4B resin from GE Healthcare,  
400 equilibrated with the same buffer for 2 hours, then applied to a gravity flow column to allow  
401 unbound proteins to flow through. The column was washed with the resuspension buffer till the  
402 absorbance at 280 nm reached baseline. The bound protein was eluted out of the column with  
403 resuspension buffer containing 20 mM reduced glutathione and then dialyzed back into the  
404 resuspension buffer overnight at 4°C.

#### 405 **Isothermal Titration Calorimetry**

406 All ITC titrations were performed on a MicroCal PEAQ-ITC instrument (Malvern  
407 Pananalytical Inc., MA). All reactions were performed in 20 mM Tris pH 7.5, 150 mM NaCl  
408 using 100  $\mu$ M of all macrodomain proteins at 25°C. Titration of 2 mM ADP-ribose or ATP  
409 (MilliporeSigma) contained in the stirring syringe included a single 0.4  $\mu$ L injection, followed by  
410 18 consecutive injections of 2  $\mu$ L. Data analysis of thermograms was analyzed using one set of  
411 binding sites model of the MicroCal ITC software to obtain all fitting model parameters for the  
412 experiments.

### 413 **Differential Scanning Fluorimetry (DSF)**

414 Thermal shift assay with DSF involved use of LightCycler® 480 Instrument (Roche  
415 Diagnostics). In total, a 15  $\mu$ L mixture containing 8X SYPRO Orange (Invitrogen), and 10  $\mu$ M  
416 macrodomain protein in buffer containing 20 mM Hepes, NaOH, pH 7.5 and various  
417 concentrations of ADP-ribose were mixed on ice in 384-well PCR plate (Roche). Fluorescent  
418 signals were measured from 25 to 95 °C in 0.2 °C/30-s steps (excitation, 470-505 nm; detection,  
419 540-700 nm). The main measurements were carried out in triplicate. Data evaluation and  $T_m$   
420 determination involved use of the Roche LightCycler® 480 Protein Melting Analysis software,  
421 and data fitting calculations involved the use of single site binding curve analysis on Graphpad  
422 Prism.

### 423 **MAR Hydrolase Assays**

424 *Automodification of PARP10-CD protein:* A 10  $\mu$ M solution of purified PAPR10-CD  
425 protein was incubated for 20 minutes at 37°C with 1 mM final concentration of  $\beta$ -Nicotinamide  
426 Adenine Dinucleotide ( $\beta$  NAD<sup>+</sup>) (Millipore-Sigma) in a reaction buffer (50 mM HEPES, 150  
427 mM NaCl, 0.2 mM DTT, and 0.02% NP-40). MARylated PARP10 was aliquoted and stored at -  
428 80°C.

429 *PAPR10-CD ADP-ribose hydrolysis:* All reactions were performed at 37°C for the  
430 designated time. A 1  $\mu$ M solution of MARylated PARP10-CD and purified Mac1 protein was  
431 added in the reaction buffer (50 mM HEPES, 150 mM NaCl, 0.2 mM DTT, and 0.02% NP-40).  
432 The reaction was stopped with addition of 2X Laemmli sample buffer containing 10%  $\beta$ -  
433 mercaptoethanol.

434 Protein samples were heated at 95°C for 5 minutes before loading and separated onto  
435 SDS-PAGE cassette (Thermo Fisher Scientific Bolt™ 4-12% Bis-Tris Plus Gels) in MES

436 running buffer. For direct protein detection, the SDS-PAGE gel was stained using InstantBlue®  
437 Protein Stain (Expedeon). For immunoblotting, the separated proteins were transferred onto  
438 polyvinylidene difluoride (PVDF) membrane using iBlot™ 2 Dry Blotting System  
439 (ThermoFisher Scientific). The blot was blocked with 5% skim milk in PBS containing 0.05%  
440 Tween-20 and probed with anti-mono or poly ADP-ribose binding reagents/antibodies  
441 MABE1076 ( $\alpha$ -MAR), MABC547 ( $\alpha$ -PAR), MABE1075 ( $\alpha$ -MAR/PAR) (Millipore-Sigma) and  
442 anti-GST tag monoclonal antibody MA4-004 (ThermoFisher Scientific). The primary antibodies  
443 were detected with secondary infrared anti-rabbit and anti-mouse antibodies (LI-COR  
444 Biosciences). All immunoblots were visualized using Odyssey® CLx Imaging System (LI-COR  
445 Biosciences). The images were quantitated using Image J (National Institutes for Health (NIH))  
446 or Image Studio software.

447 *Kinetic analysis of ADP-ribose hydrolysis:* To quantify the initial rate ( $k$ ) of substrate  
448 decay associated with the four macrodomains, each data set represented in the substrate decay  
449 immunoblots in Fig. 6C, were fitted to a decaying exponential with the following functional  
450 form:  $([S]_{initial} - [S]_{final})e^{-k([S]_{initial})^n} + [S]_{final}$  (Mathematica 12, Wolfram Alpha). The decay plots  
451 and resulting values for the fitted parameter  $k$  along with statistic uncertainty (SD) are shown in  
452 Fig. 6D.

453 *ELISA-based MAR hydrolysis:* ELISA Well-Coated™ Glutathione plates (G-Biosciences,  
454 USA) were washed with phosphate-buffered saline (PBS) containing 0.05% Tween-20 (PBS-T)  
455 and incubated with 50  $\mu$ L of 100 nM automodified MARYlated PARP10-CD in PBS for one  
456 hour under room temperature. Following four washes with PBS-T, variable concentrations of  
457 SARS-CoV-2 Mac1 were incubated with MARYlated PARP10-CD for 60 minutes at 37°C.  
458 Purified macrodomains were 2-fold serially diluted starting at 100 nM in reaction buffer prior to

459 addition to MARylated PARP10-CD. Subsequently, ELISA wells were washed four times with  
460 PBS-T and incubated with 50  $\mu$ L/well of anti-GST (Invitrogen MA4-004) or anti-MAR  
461 (Millipore-Sigma MAB1076) diluted 1:5,000 in 5 mg/ml BSA in PBS-T (BSA5-PBS-T) for 1  
462 hour at room temperature. After four additional washes with PBS-T, each well was incubated  
463 with 50  $\mu$ L diluted 1:5,000 in BSA5-PBS-T of anti-rabbit-HRP (SouthernBiotech, USA) or anti-  
464 mouse-HRP (Rockland Immunochemicals, USA) conjugate for 1 hour at room temperature. The  
465 plate was washed four times with PBS-T and 100  $\mu$ L of TMB peroxidase substrate solution  
466 (SouthernBiotech, USA) was added to each well and incubated for 10 minutes. The peroxidase  
467 reaction was stopped with 50  $\mu$ L per well of 1 M HCl before proceeding to reading. Absorbance  
468 was measured at 450 nm and subtracted from 620 nm using Biotek Powerwave XS plate reader  
469 (BioTek). As controls, MARylated PARP10-CD and non-MARylated PARP10 were detected  
470 with both anti-MAR and anti-GST antibodies. The absorbance of non-MARylated PARP10-CD  
471 detected with anti-MAR antibody was used to establish the background signal. The % signal  
472 remaining was calculated by dividing the experimental signal (+ enzyme) minus background by  
473 the control (no enzyme) minus the background.

#### 474 **PAR Hydrolase Assay**

475 *Automodification of PARP1 protein:* PARP1 was incubated with increasing  
476 concentrations of NAD<sup>+</sup> to generate a range of PARP1 automodification levels. Highly purified  
477 human 6X-His-PARP1 (43) (5  $\mu$ g) was incubated for 30 min at 30°C in a reaction buffer  
478 containing 100 mM Tris-HCl pH 8.0, 10 mM MgCl<sub>2</sub>, 10% (v/v) glycerol, 10 mM DTT, 0 to 500  
479  $\mu$ M NAD<sup>+</sup>, 10% (v/v) ethanol and 25  $\mu$ g/mL calf thymus activated DNA (Sigma-Aldrich).

480 *PARP1 ADP-ribose hydrolysis:* To evaluate the PAR hydrolase activity of CoV  
481 macrodomains, 200 ng of slightly automodified PARP1 with 5  $\mu$ M NAD<sup>+</sup> or highly



482 automodified with 500  $\mu$ M NAD<sup>+</sup> were used as substrates for the de-PARylation assays.  
483 Recombinant macrodomain protein (1  $\mu$ g) was supplemented to the reaction buffer (100 mM  
484 Tris-HCl pH 8.0, 10% (v/v) glycerol and 10 mM DTT) containing automodified PARP1 and  
485 incubated for 1 hour at 37°C. Recombinant PARG (1  $\mu$ g) was used as a positive control for PAR  
486 erasing (44). Reaction mixtures were resolved on 4–12% Criterion™ XT Bis-Tris protein gels,  
487 transferred onto nitrocellulose membrane and probed with the anti-PAR polyclonal antibody 96-  
488 10.

### 489 **Structure Determination**

490 *Crystallization and Data Collection:* Purified SARS-CoV-2 Mac1 in 150 mM NaCl, 20  
491 mM Tris pH 8.0 was concentrated to 13.8 mg/mL for crystallization screening. All crystallization  
492 experiments were setup using an NT8 drop-setting robot (Formulatrix Inc.) and UVXPO MRC  
493 (Molecular Dimensions) sitting drop vapor diffusion plates at 18°C. 100 nL of protein and 100  
494 nL crystallization solution were dispensed and equilibrated against 50  $\mu$ L of the latter. The  
495 SARS-CoV-2 Mac1 complex with ADP-ribose was prepared by adding the ligand, from a 100  
496 mM stock in water, to the protein at a final concentration of 2 mM. Crystals that were obtained in  
497 1-2 days from the Salt Rx HT screen (Hampton Research) condition E10 (1.8 M  
498 NaH<sub>2</sub>PO<sub>4</sub>/K<sub>2</sub>HPO<sub>4</sub>, pH 8.2). Refinement screening was conducted using the additive screen HT  
499 (Hampton Research) by supplementing 10% of each additive to the Salt Rx HT E10 condition in  
500 a new 96-well UVXPO crystallization plate. The crystals used for data collection were obtained  
501 from Salt Rx HT E10 supplemented with 0.1 M NDSB-256 from the additive screen (Fig. S1).  
502 Samples were transferred to a fresh drop composed of 80% crystallization solution and 20%  
503 (v/v) PEG 200 and stored in liquid nitrogen. X-ray diffraction data were collected at the

504 Advanced Photon Source, IMCA-CAT beamline 17-ID using a Dectris Eiger 2X 9M pixel array  
505 detector.

506 *Structure Solution and Refinement:* Intensities were integrated using XDS (45, 46) via  
507 Autoproc (47) and the Laue class analysis and data scaling were performed with Aimless (48).  
508 Notably, a pseudo-translational symmetry peak was observed at (0, 0.31 0.5) that was 44.6% of  
509 the origin. Structure solution was conducted by molecular replacement with Phaser (49) using a  
510 previously determined structure of ADP-ribose bound SARS-CoV-2 Mac1 (PDB 6W02) as the  
511 search model. The top solution was obtained in the space group  $P2_1$  with four molecules in the  
512 asymmetric unit. Structure refinement and manual model building were conducted with Phenix  
513 (50) and Coot (51) respectively. Disordered side chains were truncated to the point for which  
514 electron density could be observed. Structure validation was conducted with Molprobit (52) and  
515 figures were prepared using the CCP4MG package (53). Superposition of the macrodomain  
516 structures was conducted with GESAMT (54).

### 517 **Statistical Analysis**

518 All statistical analyses were done using an unpaired two-tailed student's t-test to assess  
519 differences in mean values between groups, and graphs are expressed as mean  $\pm$ SD. Significant p  
520 values are denoted with \* $p \leq 0.05$ .

### 521 **ACCESSION CODES**

522 The coordinates and structure factors for SARS-CoV-2 Mac1 were deposited to the  
523 Worldwide Protein Databank (wwPDB) with the accession code 6WOJ.

### 524 **ACKNOWLEDGEMENTS**

525 We'd like to thank Ivan Ahel and Gytis Jankevicius (Oxford University) for providing  
526 protein expression plasmids; John Pascal (University of Montreal) and Marie-France Langelier

527 (Universite de Montreal) for providing PARP1; and Wenqing Xu (University of Washington) for  
528 providing PARG. This research was funded by the National Institutes of Health (NIH) grant  
529 numbers P20 GM113117, P30GM110761, and AI134993-01, and University of Kansas start-up  
530 funds to A.R.F, and the Canadian Institutes of Health Research grant number MOP-418863 to  
531 G.G.P. Use of the IMCA-CAT beamline 17-ID at the Advanced Photon Source was supported by  
532 the companies of the Industrial Macromolecular Crystallography Association through a contract  
533 with Hauptman-Woodward Medical Research Institute. Use of the Advanced Photon Source was  
534 supported by the U.S. Department of Energy, Office of Science, Office of Basic Energy  
535 Sciences, under Contract No. DE-AC02-06CH11357.  
536

537 **AUTHOR CONTRIBUTIONS**

- 538 Conceptualization: ARF, YMOA, GGP
- 539 Data curation: YMOA, SL, JPG, ARF, EDH
- 540 Formal analysis: YMOA, DKJ, AR, SL, ARF, EDH
- 541 Funding acquisition: GGP, SL, ARF
- 542 Investigation: YMOA, MMK, AR, JPG, LN, PM, KPB
- 543 Methodology: YMOA, GGP, AR, JPG, EDH, SL, ARF
- 544 Project administration: GGP, SL, ARF
- 545 Resources: AR, SL, PG, ARF
- 546 Supervision: AR, GGP, SL ARF
- 547 Validation: YMOA, SL, AR, JPG, GGP, ARF
- 548 Visualization: YMOA, ARF, AR, SL, JPG
- 549 Writing – original draft: YMOA, SL, ARF
- 550 Writing – review & editing: all authors
- 551

## 552 REFERENCES

- 553
- 554 1. Zhou P, Yang XL, Wang XG, Hu B, Zhang L, Zhang W, Si HR, Zhu Y, Li B, Huang CL,  
555 Chen HD, Chen J, Luo Y, Guo H, Jiang RD, Liu MQ, Chen Y, Shen XR, Wang X, Zheng  
556 XS, Zhao K, Chen QJ, Deng F, Liu LL, Yan B, Zhan FX, Wang YY, Xiao GF, Shi ZL.  
557 2020. A pneumonia outbreak associated with a new coronavirus of probable bat origin.  
558 *Nature* 579:270-273.
  - 559 2. Coronaviridae Study Group of the International Committee on Taxonomy of V. 2020.  
560 The species Severe acute respiratory syndrome-related coronavirus: classifying 2019-  
561 nCoV and naming it SARS-CoV-2. *Nat Microbiol* 5:536-544.
  - 562 3. Srinivasan S, Cui H, Gao Z, Liu M, Lu S, Mkandawire W, Narykov O, Sun M, Korkin D.  
563 2020. Structural Genomics of SARS-CoV-2 Indicates Evolutionary Conserved  
564 Functional Regions of Viral Proteins. *Viruses* 12:360.
  - 565 4. Wu C, Liu Y, Yang Y, Zhang P, Zhong W, Wang Y, Wang Q, Xu Y, Li M, Li X, Zheng  
566 M, Chen L, Li H. 2020. Analysis of therapeutic targets for SARS-CoV-2 and discovery  
567 of potential drugs by computational methods. *Acta Pharm Sin B*  
568 doi:10.1016/j.apsb.2020.02.008.
  - 569 5. Fehr AR, Perlman S. 2015. Coronaviruses: An Overview of Their Replication and  
570 Pathogenesis, p 1-23. *In* Maier HJ, Bickerton E, Britton P (ed), *Coronaviruses*, vol 1282.  
571 Springer New York.
  - 572 6. Egloff MP, Malet H, Putics A, Heinonen M, Dutartre H, Frangeul A, Guez A,  
573 Campanacci V, Cambillau C, Ziebuhr J, Ahola T, Canard B. 2006. Structural and  
574 functional basis for ADP-ribose and poly(ADP-ribose) binding by viral macro domains. *J*  
575 *Virol* 80:8493-502.
  - 576 7. Putics A, Filipowicz W, Hall J, Gorbalenya AE, Ziebuhr J. 2005. ADP-ribose-1"-  
577 monophosphatase: a conserved coronavirus enzyme that is dispensable for viral  
578 replication in tissue culture. *J Virol* 79:12721-31.
  - 579 8. Saikatendu KS, Joseph JS, Subramanian V, Clayton T, Griffith M, Moy K, Velasquez J,  
580 Neuman BW, Buchmeier MJ, Stevens RC, Kuhn P. 2005. Structural basis of severe acute  
581 respiratory syndrome coronavirus ADP-ribose-1"-phosphate dephosphorylation by a  
582 conserved domain of nsP3. *Structure* 13:1665-75.
  - 583 9. Cho CC, Lin MH, Chuang CY, Hsu CH. 2016. Macro Domain from Middle East  
584 Respiratory Syndrome Coronavirus (MERS-CoV) Is an Efficient ADP-ribose Binding  
585 Module: CRYSTAL STRUCTURE AND BIOCHEMICAL STUDIES. *J Biol Chem*  
586 291:4894-902.
  - 587 10. Xu Y, Cong L, Chen C, Wei L, Zhao Q, Xu X, Ma Y, Bartlam M, Rao Z. 2009. Crystal  
588 structures of two coronavirus ADP-ribose-1"-monophosphatases and their complexes  
589 with ADP-Ribose: a systematic structural analysis of the viral ADRP domain. *J Virol*  
590 83:1083-92.
  - 591 11. Tan J, Vonnrhein C, Smart OS, Bricogne G, Bollati M, Kusov Y, Hansen G, Mesters JR,  
592 Schmidt CL, Hilgenfeld R. 2009. The SARS-unique domain (SUD) of SARS coronavirus  
593 contains two macrodomains that bind G-quadruplexes. *PLoS Pathog* 5:e1000428.
  - 594 12. Chatterjee A, Johnson MA, Serrano P, Pedrini B, Joseph JS, Neuman BW, Saikatendu K,  
595 Buchmeier MJ, Kuhn P, Wuthrich K. 2009. Nuclear magnetic resonance structure shows  
596 that the severe acute respiratory syndrome coronavirus-unique domain contains a  
597 macrodomain fold. *J Virol* 83:1823-36.

- 598 13. Makrynitsa GI, Ntonti D, Marousis KD, Birkou M, Matsoukas MT, Asami S, Bentrop D,  
599 Papageorgiou N, Canard B, Coutard B, Spyroulias GA. 2019. Conformational plasticity  
600 of the VEEV macro domain is important for binding of ADP-ribose. *J Struct Biol*  
601 206:119-127.
- 602 14. Malet H, Coutard B, Jamal S, Dutartre H, Papageorgiou N, Neuvonen M, Ahola T,  
603 Forrester N, Gould EA, Lafitte D, Ferron F, Lescar J, Gorbalenya AE, de Lamballerie X,  
604 Canard B. 2009. The crystal structures of Chikungunya and Venezuelan equine  
605 encephalitis virus nsP3 macro domains define a conserved adenosine binding pocket. *J*  
606 *Virol* 83:6534-45.
- 607 15. Rack JG, Perina D, Ahel I. 2016. Macrodomains: Structure, Function, Evolution, and  
608 Catalytic Activities. *Annu Rev Biochem* 85:431-54.
- 609 16. Li C, Debing Y, Jankevicius G, Neyts J, Ahel I, Coutard B, Canard B. 2016. Viral Macro  
610 Domains Reverse Protein ADP-Ribosylation. *J Virol* 90:8478-86.
- 611 17. Ecke L, Krieg S, Butepage M, Lehmann A, Gross A, Lippok B, Grimm AR, Kummerer  
612 BM, Rossetti G, Luscher B, Verheugd P. 2017. The conserved macrodomains of the non-  
613 structural proteins of Chikungunya virus and other pathogenic positive strand RNA  
614 viruses function as mono-ADP-ribosylhydrolases. *Sci Rep* 7:41746.
- 615 18. Fehr AR, Channappanavar R, Jankevicius G, Fett C, Zhao J, Athmer J, Meyerholz DK,  
616 Ahel I, Perlman S. 2016. The Conserved Coronavirus Macrodomain Promotes Virulence  
617 and Suppresses the Innate Immune Response during Severe Acute Respiratory Syndrome  
618 Coronavirus Infection. *mBio* 7:e01721-16.
- 619 19. Kim DS, Challa S, Jones A, Kraus WL. 2020. PARPs and ADP-ribosylation in RNA  
620 biology: from RNA expression and processing to protein translation and proteostasis.  
621 *Genes Dev* 34:302-320.
- 622 20. Fehr AR, Singh SA, Kerr CM, Mukai S, Higashi H, Aikawa M. 2020. The impact of  
623 PARPs and ADP-ribosylation on inflammation and host-pathogen interactions. *Genes*  
624 *Dev* 34:341-359.
- 625 21. Eriksson KK, Cervantes-Barragan L, Ludewig B, Thiel V. 2008. Mouse hepatitis virus  
626 liver pathology is dependent on ADP-ribose-1"-phosphatase, a viral function conserved in  
627 the alpha-like supergroup. *J Virol* 82:12325-34.
- 628 22. Fehr AR, Athmer J, Channappanavar R, Phillips JM, Meyerholz DK, Perlman S. 2015.  
629 The nsp3 macrodomain promotes virulence in mice with coronavirus-induced  
630 encephalitis. *J Virol* 89:1523-36.
- 631 23. Grunewald ME, Chen Y, Kuny C, Maejima T, Lease R, Ferraris D, Aikawa M, Sullivan  
632 CS, Perlman S, Fehr AR. 2019. The coronavirus macrodomain is required to prevent  
633 PARP-mediated inhibition of virus replication and enhancement of IFN expression. *PLoS*  
634 *Pathog* 15:e1007756.
- 635 24. Alhammad YMO, Fehr AR. 2020. The Viral Macrodomain Counters Host Antiviral  
636 ADP-Ribosylation. *Viruses* 12:384.
- 637 25. Abraham R, Hauer D, McPherson RL, Utt A, Kirby IT, Cohen MS, Merits A, Leung  
638 AKL, Griffin DE. 2018. ADP-ribosyl-binding and hydrolase activities of the alphavirus  
639 nsP3 macrodomain are critical for initiation of virus replication. *Proc Natl Acad Sci U S*  
640 *A* 115:E10457-E10466.
- 641 26. Abraham R, McPherson RL, Dasovich M, Badiiee M, Leung AKL, Griffin DE. 2020.  
642 Both ADP-Ribosyl-Binding and Hydrolase Activities of the Alphavirus nsP3  
643 Macrodomain Affect Neurovirulence in Mice. *mBio* 11.

- 644 27. McPherson RL, Abraham R, Sreekumar E, Ong SE, Cheng SJ, Baxter VK, Kistemaker  
645 HA, Filippov DV, Griffin DE, Leung AK. 2017. ADP-ribosylhydrolase activity of  
646 Chikungunya virus macrodomain is critical for virus replication and virulence. *Proc Natl*  
647 *Acad Sci U S A* 114:1666-1671.
- 648 28. Parvez MK. 2015. The hepatitis E virus ORF1 'X-domain' residues form a putative  
649 macrodomain protein/Appr-1"-pase catalytic-site, critical for viral RNA replication. *Gene*  
650 566:47-53.
- 651 29. Vuksanovic N, Silvaggi, N.R. National Science Foundation (NSF, United States). 2020.  
652 High-resolution structure of the SARS-CoV-2 NSP3 Macro X domain doi:  
653 10.2210/pdb6WEY/pdb. doi:10.2210/pdb6WEY/pdb.
- 654 30. Michalska K, Stols, L., Jedrzejczak, R., Endres, M., Babnigg, G., Kim, Y., Joachimiak,  
655 A., Center for Structural Genomics of Infectious Diseases (CSGID). 2020. Crystal  
656 Structure of ADP ribose phosphatase of NSP3 from SARS-CoV-2 in the apo doi:  
657 10.2210/pdb6WEN/pdb. doi:10.2210/pdb6wen/pdb.
- 658 31. Michalska K, Kim, Y., Jedrzejczak, R., Maltseva, N., Endres, M., Mecesar, A.,  
659 Joachimiak, A., Center for Structural Genomics of Infectious Diseases (CSGID). 2020.  
660 Crystal Structure of ADP ribose phosphatase of NSP3 from SARS CoV-2 in the complex  
661 with ADP ribose doi: 10.2210/pdb6W02/pdb. doi:10.2210/pdb6W02/pdb.
- 662 32. Frick DN, Viridi RS, Vuksanovic N, Dahal N, Silvaggi NR. 2020. Molecular Basis for  
663 ADP-Ribose Binding to the Mac1 Domain of SARS-CoV-2 nsp3. *Biochemistry (Mosc)*  
664 59:2608-2615.
- 665 33. Jankevicius G, Hassler M, Golia B, Rybin V, Zacharias M, Timinszky G, Ladurner AG.  
666 2013. A family of macrodomain proteins reverses cellular mono-ADP-ribosylation. *Nat*  
667 *Struct Mol Biol* 20:508-14.
- 668 34. Leung AKL, McPherson RL, Griffin DE. 2018. Macrodomain ADP-ribosylhydrolase and  
669 the pathogenesis of infectious diseases. *PLoS Pathog* 14:e1006864.
- 670 35. Lei J, Kusov Y, Hilgenfeld R. 2018. Nsp3 of coronaviruses: Structures and functions of a  
671 large multi-domain protein. *Antiviral Res* 149:58-74.
- 672 36. Heer CD, Sanderson DJ, Alhammad YMO, Schmidt MS, Trammell SAJ, Perlman S,  
673 Cohen MS, Fehr AR, Brenner C. 2020. Coronavirus and PARP expression dysregulate  
674 the NAD Metabolome: a potentially actionable component of innate immunity. *bioRxiv*  
675 doi:10.1101/2020.04.17.047480.
- 676 37. Shull NP, Spinelli SL, Phizicky EM. 2005. A highly specific phosphatase that acts on  
677 ADP-ribose 1"-phosphate, a metabolite of tRNA splicing in *Saccharomyces cerevisiae*.  
678 *Nucleic Acids Res* 33:650-60.
- 679 38. Rosenthal F, Feijs KL, Frugier E, Bonalli M, Forst AH, Imhof R, Winkler HC, Fischer D,  
680 Caflisch A, Hassa PO, Luscher B, Hottiger MO. 2013. Macrodomain-containing proteins  
681 are new mono-ADP-ribosylhydrolases. *Nat Struct Mol Biol* 20:502-7.
- 682 39. Sharifi R, Morra R, Appel CD, Tallis M, Chioza B, Jankevicius G, Simpson MA, Matic I,  
683 Ozkan E, Golia B, Schellenberg MJ, Weston R, Williams JG, Rossi MN, Galehdari H,  
684 Krahn J, Wan A, Trembath RC, Crosby AH, Ahel D, Hay R, Ladurner AG, Timinszky G,  
685 Williams RS, Ahel I. 2013. Deficiency of terminal ADP-ribose protein glycohydrolase  
686 TARG1/C6orf130 in neurodegenerative disease. *EMBO J* 32:1225-37.
- 687 40. Gibson BA, Conrad LB, Huang D, Kraus WL. 2017. Generation and Characterization of  
688 Recombinant Antibody-like ADP-Ribose Binding Proteins. *Biochemistry (Mosc)*  
689 56:6305-6316.



- 690 41. Affar EB, Duriez PJ, Shah RG, Winstall E, Germain M, Boucher C, Bourassa S, Kirkland  
691 JB, Poirier GG. 1999. Immunological determination and size characterization of  
692 poly(ADP-ribose) synthesized in vitro and in vivo. *Biochim Biophys Acta* 1428:137-46.
- 693 42. Asokanathan C, Tierney S, Ball CR, Buckle G, Day A, Tanley S, Bristow A, Markey K,  
694 Xing D, Yuen CT. 2018. An ELISA method to estimate the mono ADP-  
695 ribosyltransferase activities: e.g in pertussis toxin and vaccines. *Anal Biochem* 540-  
696 541:15-19.
- 697 43. Langelier MF, Planck JL, Servent KM, Pascal JM. 2011. Purification of human PARP-1  
698 and PARP-1 domains from *Escherichia coli* for structural and biochemical analysis.  
699 *Methods Mol Biol* 780:209-26.
- 700 44. Wang Z, Gagne JP, Poirier GG, Xu W. 2014. Crystallographic and biochemical analysis  
701 of the mouse poly(ADP-ribose) glycohydrolase. *PLoS One* 9:e86010.
- 702 45. Kabsch W. 1988. Evaluation of Single-Crystal X-Ray-Diffraction Data from a Position-  
703 Sensitive Detector. *J Appl Crystallogr* 21:916-924.
- 704 46. Kabsch W. 2010. Xds. *Acta Crystallogr D Biol Crystallogr* 66:125-32.
- 705 47. Vonrhein C, Flensburg C, Keller P, Sharff A, Smart O, Paciorek W, Womack T,  
706 Bricogne G. 2011. Data processing and analysis with the autoPROC toolbox. *Acta*  
707 *Crystallogr D Biol Crystallogr* 67:293-302.
- 708 48. Evans PR. 2011. An introduction to data reduction: space-group determination, scaling  
709 and intensity statistics. *Acta Crystallogr D Biol Crystallogr* 67:282-92.
- 710 49. McCoy AJ, Grosse-Kunstleve RW, Adams PD, Winn MD, Storoni LC, Read RJ. 2007.  
711 Phaser crystallographic software. *J Appl Crystallogr* 40:658-674.
- 712 50. Adams PD, Afonine PV, Bunkoczi G, Chen VB, Davis IW, Echols N, Headd JJ, Hung  
713 LW, Kapral GJ, Grosse-Kunstleve RW, McCoy AJ, Moriarty NW, Oeffner R, Read RJ,  
714 Richardson DC, Richardson JS, Terwilliger TC, Zwart PH. 2010. PHENIX: a  
715 comprehensive Python-based system for macromolecular structure solution. *Acta*  
716 *Crystallogr D Biol Crystallogr* 66:213-21.
- 717 51. Emsley P, Lohkamp B, Scott WG, Cowtan K. 2010. Features and development of Coot.  
718 *Acta Crystallogr D Biol Crystallogr* 66:486-501.
- 719 52. Chen VB, Arendall WB, 3rd, Headd JJ, Keedy DA, Immormino RM, Kapral GJ, Murray  
720 LW, Richardson JS, Richardson DC. 2010. MolProbity: all-atom structure validation for  
721 macromolecular crystallography. *Acta Crystallogr D Biol Crystallogr* 66:12-21.
- 722 53. Potterton L, McNicholas S, Krissinel E, Gruber J, Cowtan K, Emsley P, Murshudov GN,  
723 Cohen S, Perrakis A, Noble M. 2004. Developments in the CCP4 molecular-graphics  
724 project. *Acta Crystallogr D Biol Crystallogr* 60:2288-94.
- 725 54. Krissinel E. 2012. Enhanced fold recognition using efficient short fragment clustering. *J*  
726 *Mol Biochem* 1:76-85.
- 727 55. Evans P. 2006. Scaling and assessment of data quality. *Acta Crystallogr D Biol*  
728 *Crystallogr* 62:72-82.
- 729 56. Diederichs K, Karplus PA. 1997. Improved R-factors for diffraction data analysis in  
730 macromolecular crystallography. *Nat Struct Biol* 4:269-75.
- 731 57. Weiss MS. 2001. Global indicators of X-ray data quality. *J Appl Crystallogr* 34:130-135.
- 732 58. Evans P. 2012. Resolving some old problems in protein crystallography. *Science*  
733 336:986-7.
- 734 59. Karplus PA, Diederichs K. 2012. Linking crystallographic model and data quality.  
735 *Science* 336:1030-3.



736

## 737 **FIGURE LEGENDS**

738 **Figure 1.** The SARS-CoV-2 Mac1 is a small domain within nsp3 and is highly conserved  
739 between other human CoV Mac1 protein domains. (A) Cartoon Schematic of the SARS-CoV-2  
740 non-structural protein 3. The conserved macrodomain, or Mac1, is highlighted in yellow. (B)  
741 Sequence alignment of Mac1 from CoVs; SARS-CoV-2, SARS-CoV, MERS-CoV, and mouse  
742 hepatitis virus (MHV), and from alphaviruses Venezuelan equine encephalitis virus (VEEV) and  
743 sindbis virus (SINV), and hepatitis E virus (HEV). Sequences were aligned using the ClustalW  
744 method from Clustal Omega online tool with manual adjustment. Identical residues are bolded,  
745 shaded in grey, and marked with asterisks; semiconserved residues were shaded in grey and  
746 marked with two dots (one change amongst all viruses) or one dot (2 changes or conserved  
747 within CoV family).

748 **Figure 2.** Structure of SARS-CoV-2 Mac1 complexed with ADP-ribose. **A)** The structure was  
749 rendered as a blend through model from the N-terminus (blue) to the C-terminus (red). **B)** The  
750 structure was colored by secondary structure showing sheets (magenta) and helices (green). The  
751 ADP-ribose is rendered as gray cylinders with oxygens and nitrogens colored red and blue,  
752 respectively.

753 **Figure 3.** Binding mode of ADP-ribose in SARS-CoV-2 Mac1. **A)** Fo-Fc Polder omit map  
754 (green mesh) contoured at  $3\sigma$ . **B)** Hydrogen bond interactions (dashed lines) between ADP-  
755 ribose and amino acids. **C)** Interactions with water molecules. Direct hydrogen bond interactions  
756 are represented by dashed lines and water mediated contacts to amino acids are drawn as solid  
757 lines.

758 **Figure 4.** Structural comparison of the SARS-CoV-2 Mac1 protein with the SARS-CoV and  
759 MERS-CoV Mac1 proteins. **A-B)** Superposition of SARS-CoV-2 macrodomain (magenta) with

760 coronavirus macrodomain structures. **A)** SARS-CoV Mac1 with ADP-ribose (gold) (2FAV) and  
761 **B)** MERS-CoV Mac1 with ADP-ribose (teal) (5HOL). **C-D)** Superposition of SARS-CoV-2  
762 Mac1 (magenta) with other coronavirus Mac1 structures highlighting the ADP-ribose binding  
763 site. **C)** SARS-CoV (gold), **D)** MERS-CoV (teal). The ADP-ribose molecules are colored gray  
764 for SARS-CoV-2 Mac1 (**A-D)** and are rendered as green cylinders for SARS-CoV Mac1 (panel  
765 **A,C)** and MERS-CoV Mac1 (panel **B,D)**.

766 **Figure 5.** Human CoVs bind to ADP-ribose with similar affinity. **A-B)** ADP-ribose binding of  
767 human Mdo2 and SARS-CoV, MERS-CoV, and SARS-CoV-2 Mac1 proteins by ITC. Images in  
768 **(A)** are of one experiment representative of at least 2 independent experiments. Data in **(B)**  
769 represent the combined averages of multiple independent experiments for each protein. Mdo2  
770 n=2; SARS-CoV n=5; MERS-CoV n=6; SARS-CoV-2 n=2.

771 **Figure 6.** Coronavirus Mac1 proteins are ADP-ribosylhydrolases. **A)** The SARS-CoV-2  
772 macrodomain was incubated with MARYlated PARP10 CD *in vitro* at equimolar ratios (1  $\mu$ M)  
773 for the indicated times at 37°C. ADP-ribosylated PARP10 CD was detected by immunoblot (IB)  
774 with anti-ADP-ribose binding reagent (Millipore-Sigma MAB1076). Total PARP10 CD and  
775 macrodomain protein levels were determined by Coomassie Blue (CB) staining. PARP10 CD  
776 incubated alone at 37°C was stopped at 0 or 60 minutes. **B)** The level of de-MARYlation was  
777 measured by quantifying band intensity using Image J software. Intensity values were plotted  
778 and fit to a non-linear regression curve with error bars representing standard deviation. Results in  
779 **A** are representative experiments of two independent experiments and data in **B** represent the  
780 combined results of the two independent experiments. **C)** The Mdo2, MERS-CoV, SARS-CoV,  
781 and SARS-CoV-2 macrodomains were incubated with MARYlated PARP10 CD *in vitro* at the  
782 following ratios of [substrate]:[Mac1]: 1:1 (1  $\mu$ M), 5:1 (500 nM, 100 nM), or 10:1 (1  $\mu$ M, 100

783 nM) for the indicated times at 37°C. ADP-ribosylated PARP10 CD was detected as described  
784 above, and total PARP10 CD and macrodomain protein levels were determined by Coomassie  
785 Blue (Fig. S6). **D**) Time-dependent substrate concentrations were determined by quantifying  
786 band intensity using Image Studio software. The data were then analyzed using Mathematica 12,  
787 as described in Methods, to determine the initial rate ( $k$ ) of substrate decay. Results in **C** are  
788 representative experiments of three independent experiments and data in **D** represent the  
789 combined results of the three independent experiments.

790 **Fig. 7.** Coronavirus Mac1 proteins do not hydrolyze PAR. PAR hydrolase assays were performed  
791 with PARP1 either extensively poly-ADP-ribosylated (500  $\mu$ M NAD<sup>+</sup>) or partially poly-ADP-  
792 ribosylated (5  $\mu$ M NAD<sup>+</sup>) to produce oligo-ADP-ribose. Macrodomains were incubated with  
793 both automodified PARP1 substrates for 1 hour. PAR was detected by immunoblot with the anti-  
794 PAR antibody 96-10. PARG (catalytically active 60 kD fragment) was used as a positive control.  
795 The results are representative of 2 independent experiments.

796 **Figure 8.** Development of an ELISA assay to detect de-MARylation. **A**) Cartoon schematic of  
797 the ELISA assay. ELISA plates pre-coated with glutathione and pre-blocked were used to capture  
798 GST-tagged PARP10 proteins, which were used as a substrate for de-MARylation. The removal  
799 of MAR was detected by anti-MAR antibodies. **B**) MARylated PARP10 (MAR<sup>+</sup>) and non-  
800 MARylated PARP10 (MAR<sup>-</sup>) with no SARS-CoV-2 Mac1 as controls were detected with anti-  
801 mono-ADP-ribose binding reagent ( $\alpha$ -MAR) (Millipore-Sigma MAB1076) or with anti-GST ( $\alpha$ -  
802 GST) (Invitrogen, MA4-004). **C**) Starting at 12.5 nM, 2-fold serial dilutions of the SARS-CoV-2  
803 Mac1 protein were incubated in individual wells with MARylated PARP10-CD for 60 min at  
804 37°C. The graph represents the combined results of 2 independent experiments.

805

806 **SUPPLEMENTAL FIGURE LEGENDS**

807 **Figure S1.** Purification and crystallization of macrodomain proteins. **A)** Macrodomain proteins  
808 were purified as described in Methods. Equimolar amounts of the recombinant proteins were run  
809 on a polyacrylamide gel and visualized by Coomassie staining. **B)** Crystals of SARS-CoV-2  
810 Mac1 obtained with Salt Rx HT E10 supplemented with 0.1 M NDSB-256.

811 **Figure S2.** Extended residues at the C-terminus of the SARS-CoV-2 Mac1 clashed with  
812 symmetry related molecules. **A)** Comparison of the amino acid sequence of SARS-CoV-2 Mac1,  
813 6W02 and 6WEY. **B)** Superposition of SARS-CoV-2 Mac1 (magenta) subunit B onto subunit A  
814 of 6W02 reveals that the C-terminus would clash with symmetry related molecules (coral).

815 **Figure S3.** Comparison of the SARS-CoV-2 Mac1 protein with homologous structures. **A-B)**  
816 Superposition of SARS-CoV-2 Mac1 (magenta) with other recently determined homologous  
817 structures. **A)** SARS-CoV-2 Mac1 apo structure (6WEN), **B)** SARS-CoV-2 Mac1 complexed  
818 with ADP-ribose (6W02). The ADP-ribose molecule is colored gray for SARS-CoV-2 and is  
819 represented as green cylinders for 6W02 in panel **B**. **C-D)** Comparison of the residues in the  
820 ADP-ribose binding site. **C)** SARS-CoV-2 Mac1 apo structure (blue, 6WEN), **D)** SARS-CoV-2  
821 Mac1 complexed with ADP-ribose (green, 6W02). The ADP-ribose of SARS-CoV-2 is rendered  
822 as gray cylinders, and is represented as green cylinders for 6W02 in panel **B**.

823 **Figure S4.** ADP-ribose binding of macrodomain proteins by DSF assay. The macrodomain  
824 proteins (10  $\mu$ M) were incubated with increasing concentrations of ADP-ribose and measured by  
825 DSF as described in Methods. Mdo2 n=4; SARS-CoV n=6; MERS-CoV n=5; SARS-CoV-2 n=3.

826 **Figure S5.** Affinity of ADP-ribose binding antibodies for ADP-ribosylated PARP10 CD.  
827 MARYlated PARP10 and non-MARYlated PARP10 CD were detected by immunoblot (IB) with  
828 anti-GST (Invitrogen, MA4-004), anti-ADP-ribose binding reagents: anti-MAR (Millipore-

829 Sigma MAB1076), anti-PAR (Millipore-Sigma MABC547), and anti-MAR/PAR (Millipore-  
830 Sigma MABE1075) antibodies.

831 **Figure S6.** MARylated PARP10 stability over time. The presence of mono-ADP-ribose of  
832 automodified PARP10 without any macrodomain was detected at 6 time points by immunoblot  
833 analysis with the anti-GST (Invitrogen, MA4-004) and anti-ADP-ribose binding reagent anti-  
834 MAR (Millipore-Sigma MAB1076).

835 **Figure S7.** The CoVs and human Mdo2 macrodomain proteins were incubated with MARylated  
836 PARP10 CD *in vitro* for the indicated times at 37°C. Total PARP10 CD and macrodomain  
837 protein levels were determined by Coomassie Blue (CB) staining. Results show one experiment  
838 of three independent experiments.

839 **Figure S8.** Differential PARylation of PARP1 by varying concentrations of NAD<sup>+</sup>. Recombinant  
840 human PARP1 was automodified in a reaction buffer supplemented with increasing  
841 concentrations of NAD<sup>+</sup> to generate substrates for the PAR hydrolase assays. PAR was detected  
842 by immunoblot analysis of reaction products with the anti-PAR antibody 96-10.

**A**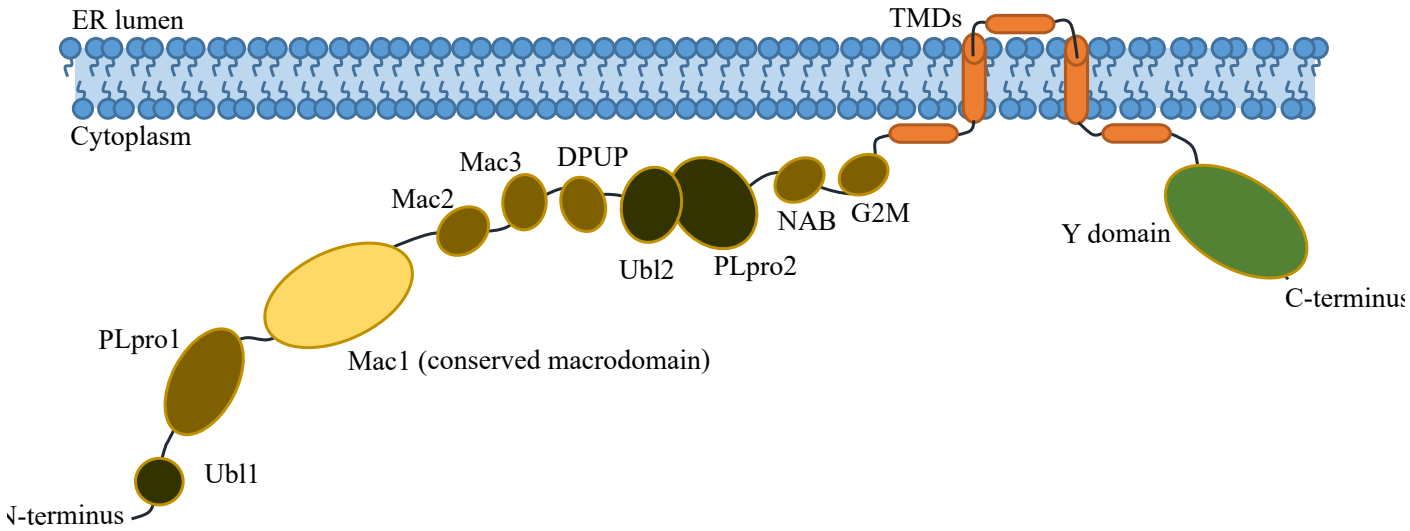**B**

| SARS-CoV-2 aa   | 10                                                             | 20                                    | 30   | 40    | 50  | 60  | 70  |       |
|-----------------|----------------------------------------------------------------|---------------------------------------|------|-------|-----|-----|-----|-------|
| SARS-CoV-2      | IEVNSFSGYLKLKLT-----DNVYIKNADIVEEAKKVKPTVVVNAANVYLKHHGGVAGALN  | KATNNAMQVESDDYIATNGP                  | 74   |       |     |     |     |       |
| SARS-CoV        | EPVNFQFTGYLKLKLT-----DNVAIKCVDIVKEAQSANPMVIVNAANIHLKHHGGVAGALN | KATNGAMQKESDDYIKLNGP                  | 74   |       |     |     |     |       |
| MERS-CoV        | -PLSNFEH-KVIT-----ECVTIVLGDAIQVAKCYGESVLVNAANTHLKHHGGGIAGALNA  | ASKGAVQKESDEYILAKGP                   | 72   |       |     |     |     |       |
| MHV             | -----LYG-SCIT-----PNVCFVKGDVIKVLRRVGAEVIIVNPANGRMAHGA          | VAGALAKAAGKAFINETADMVKAQGV            | 68   |       |     |     |     |       |
| VEEV            | -----YTG-SRLHEAGCAPSYHVVRGDI----ATATEGVIINAANSKGGQPGGGVCG      | ALYKFFPESFDLQPIE-----                 | 62   |       |     |     |     |       |
| SINV            | -----APSYRTKRENI----ADCQEEAVVNAANPLGRPGEGVCR                   | AIYKRWPNSTFDSATE-----                 | 51   |       |     |     |     |       |
| HEV             | -----YPDGSKVFAGSL----FESTCTWLVAASNVDHRPGGGLCH                  | AFYQRYPASFDAASFVMR-----               | 54   |       |     |     |     |       |
| Conservation    | .                                                              | .                                     | .    | .:*** | **  | ..  | .   | .     |
| SARS-CoV-2 a.a. | 80                                                             | 90                                    | 100  | 110   | 120 | 130 | 140 |       |
| SARS-CoV-2      | LKVGGSVLSGHNLAHCLHVVGPNVNK--G-EDIQLLKSAYEVF-----NQHEVLLAP      | LLSAGIFGADPIH---SLR                   | 141  |       |     |     |     |       |
| SARS-CoV        | LTVGGSCLLSGHNLAHCLHVVGPNLNA--G-EDIQLLKAAYENF-----NSQDILLAP     | LLSAGIFGAKPLQ---SLQ                   | 141  |       |     |     |     |       |
| MERS-CoV        | LQVGDVLLQGHSLAKNHLHVVGPDARA--K-QDVSLLSKCYKAM-----NAYPLVVT      | PLVSAGIFGVKPAV---SFD                  | 139  |       |     |     |     |       |
| MHV             | CQVGGCYESTGGKLCCKVLNIIVGPDARGHGK-QCYSLLERAYQHI-----NKCDNVVT    | TLISAGIFSVPTDV---SLT                  | 137  |       |     |     |     |       |
| VEEV            | --VGKARLVK--GVTKHIHIVGPNFNKVKVSEVEGDKQLAEAYESI                 | AKIVNDNMYKVAIPLLSTGIFSGNKDRLTQSLN     | 137  |       |     |     |     |       |
| SINV            | --TGAKLTV--CQGKKVIHIVGPDFRKHPEAEALKLLQNA                       | YHAVADLVNEHNIKVAIPLLSTGIYAAGKDRLEVSLN | 126  |       |     |     |     |       |
| HEV             | --DGAAY---TLTPRPIIHAVAPDYRL--E-HNPKRLEAAYRETC-----SRLGTAAY     | PLLGTGIYQVPIGP---SFD                  | 117  |       |     |     |     |       |
| Conservation    | .*                                                             | .                                     | .:** | .*    | .*  | .   | .*  | :.*** |
| SARS-CoV-2 a.a. | 150                                                            | 160                                   |      |       |     |     |     |       |
| SARS-CoV-2      | VC---VDTVRTNVYLAVFDKNLYDKLV-----                               |                                       | 165  |       |     |     |     |       |
| SARS-CoV        | VC---VQTVRTQVYIAVNDKALYEQVVM DYLDNL-----                       |                                       | 172  |       |     |     |     |       |
| MERS-CoV        | YL---IREAKTRVLVVVNSQDVYKSLTIVDIPQLE-----                       |                                       | 171  |       |     |     |     |       |
| MHV             | YL---LGVVTKNVILVSNQDDFDVIEKCQVTSVAGTK-----                     |                                       | 172  |       |     |     |     |       |
| VEEV            | HLLTALDRTDADVAIYCRDKKWEWT-----                                 |                                       | 162  |       |     |     |     |       |
| SINV            | CLTTALDRTDADVTIYCLDKKWKERI--DAVLQLKE-----                      |                                       | 160  |       |     |     |     |       |
| HEV             | AWER-NHRPGDELYLPELAARWFANRPTRPTLIITD VARTA                     |                                       | 159  |       |     |     |     |       |
| Conservation    | :                                                              | :                                     | :    |       |     |     |     |       |

**A**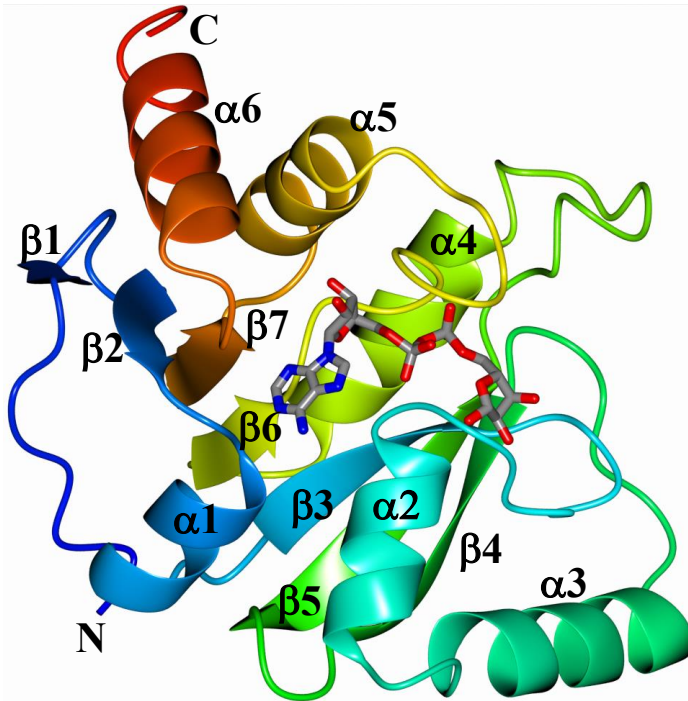

$\beta 1$ : L10-K11  
 $\beta 2$ : V16-A21  
 $\alpha 1$ : I23-V30  
 $\beta 3$ : V34-A39  
 $\alpha 2$ : V49-T57  
 $\alpha 3$ : A60-N72  
 $\beta 4$ : S79-G85  
 $\beta 5$ : A89-V96  
 $\alpha 4$ : L108-Q118  
 $\beta 6$ : V121-A124  
 $\alpha 5$ : P136-T146  
 $\beta 7$ : N150-V155  
 $\alpha 6$ : K158-F168

**B**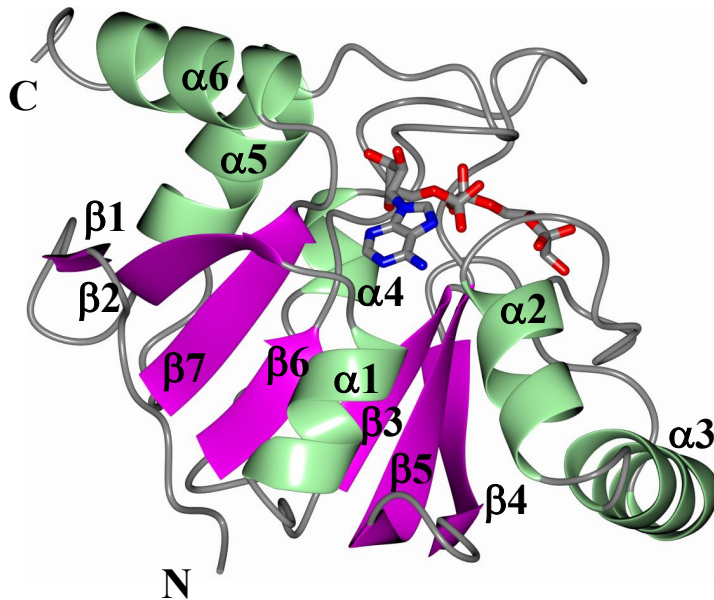



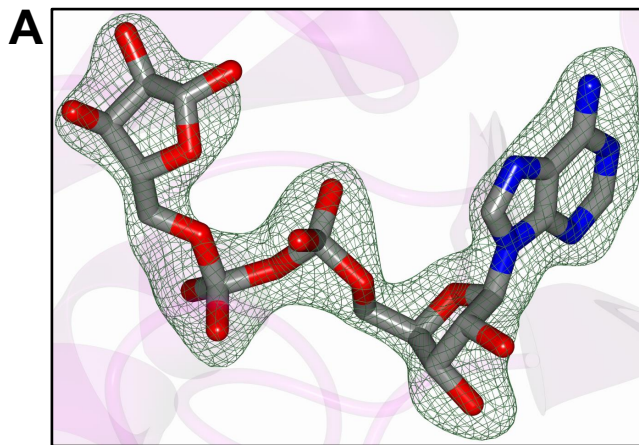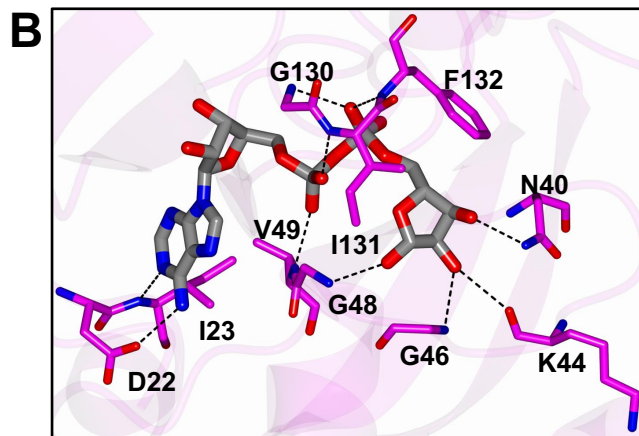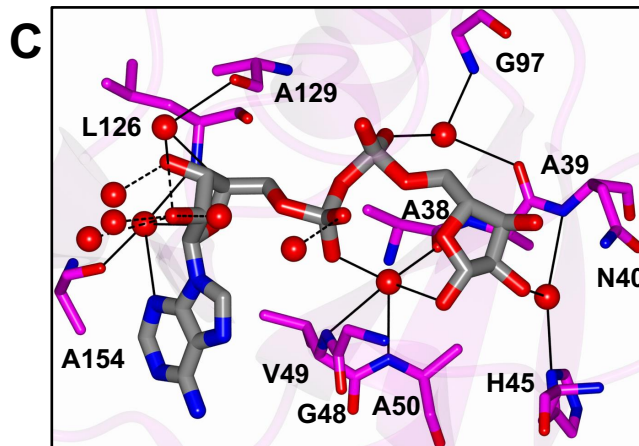



**A**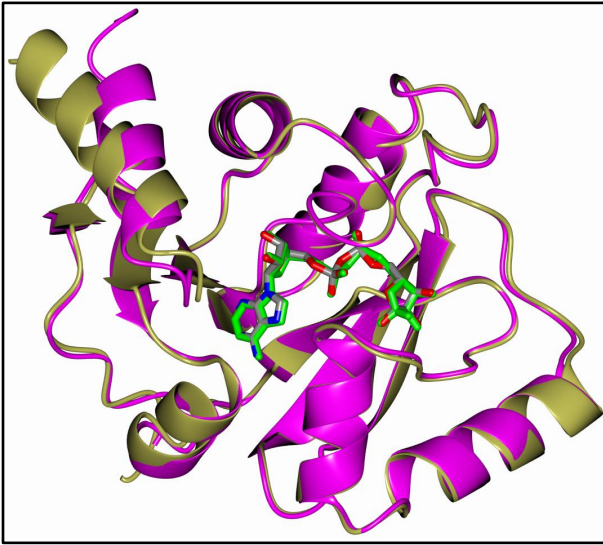**B**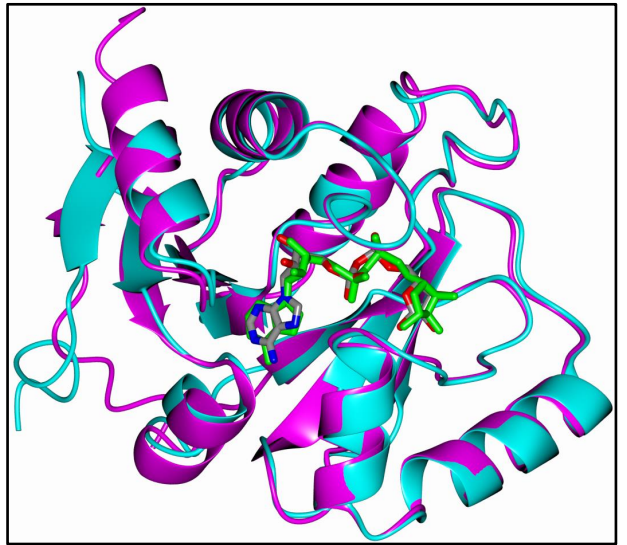**C**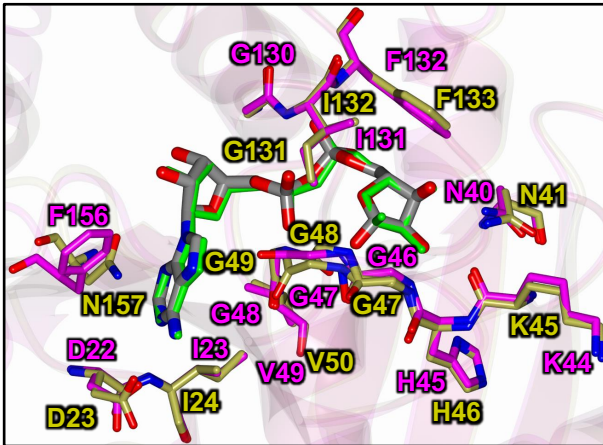**D**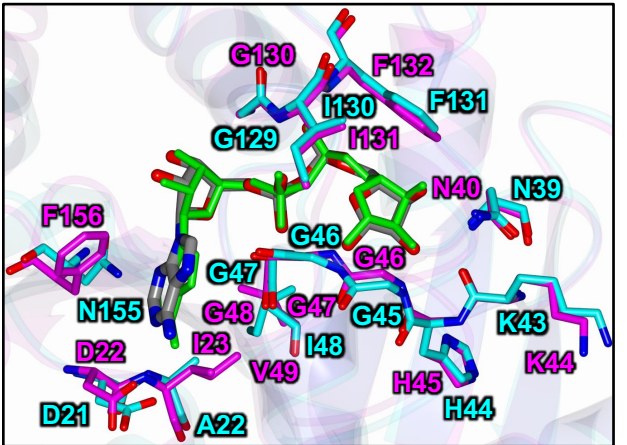

**A**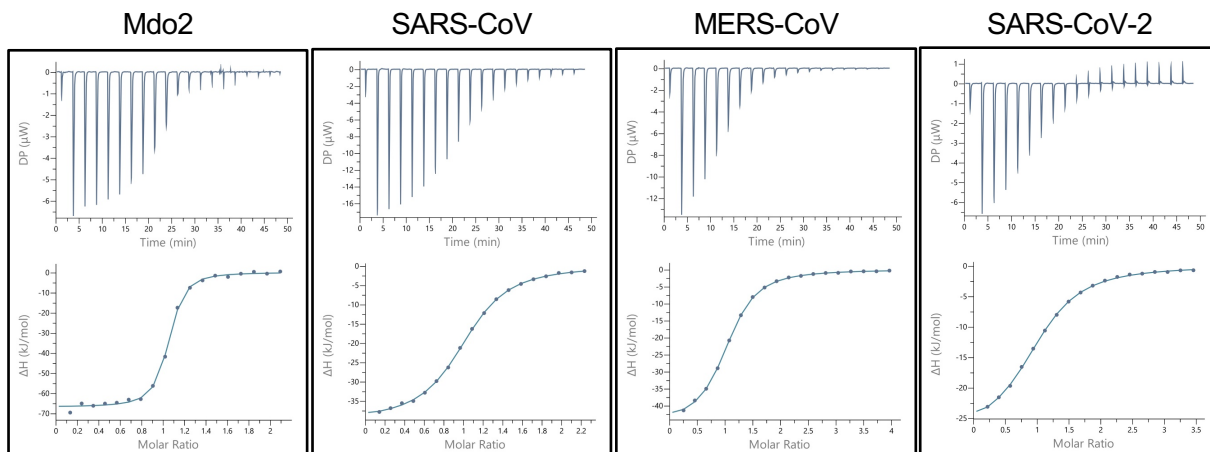**B**

| Macrodomain | Stoichiometry (N) | Kd ( $\mu\text{M}$ ) | $\Delta\text{H}$ (kcal/mol) | $\Delta\text{G}$ (kcal/mol) |
|-------------|-------------------|----------------------|-----------------------------|-----------------------------|
| Mdo2        | $0.92 \pm 0.01$   | $0.24 \pm 0.02$      | $-66 \pm 1$                 | $-38 \pm 2$                 |
| SARS-CoV    | $0.89 \pm 0.04$   | $10.8 \pm 1.7$       | $-40 \pm 1.2$               | $-28 \pm 0.4$               |
| MERS-CoV    | $0.97 \pm 0.04$   | $7.9 \pm 0.15$       | $-47 \pm 3$                 | $-29 \pm 0.4$               |
| SARS-CoV-2  | $1.14 \pm 0.06$   | $16.8 \pm 0.04$      | $-28 \pm 0.1$               | $-27 \pm 0.1$               |

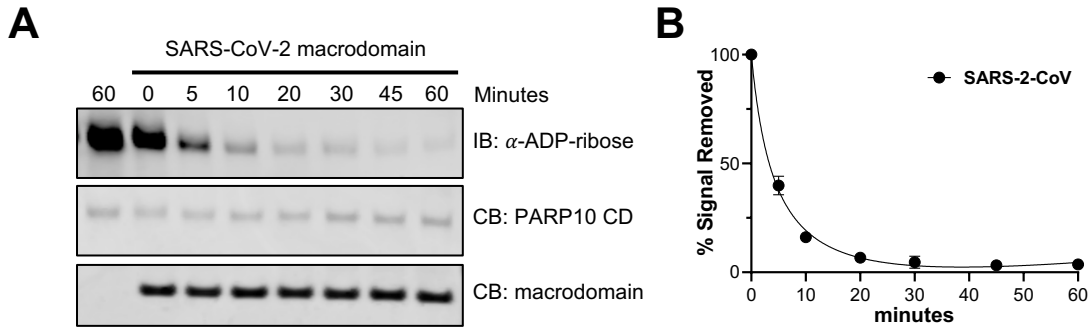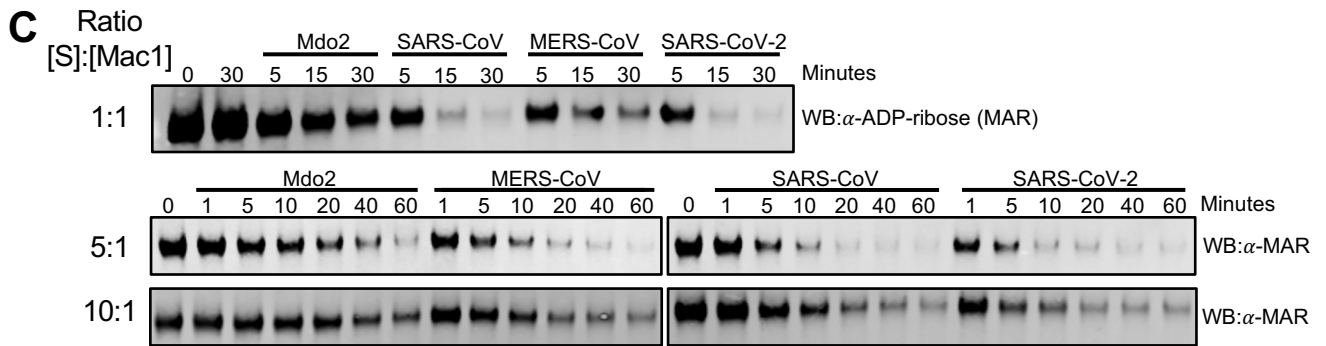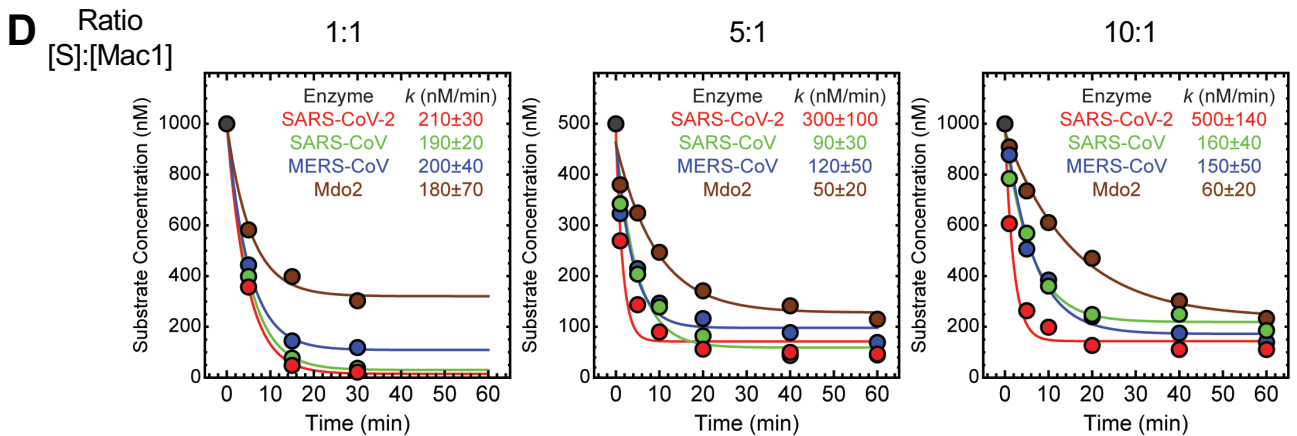

Automodified PARP1  
( 5  $\mu$ M NAD<sup>+</sup>)

Automodified PARP1  
( 500  $\mu$ M NAD<sup>+</sup>)

Control  
Mdb2  
MERS-CoV  
SARS-CoV  
SARS-CoV-2  
PARG

Control  
Mdb2  
MERS-CoV  
SARS-CoV  
SARS-CoV-2  
PARG

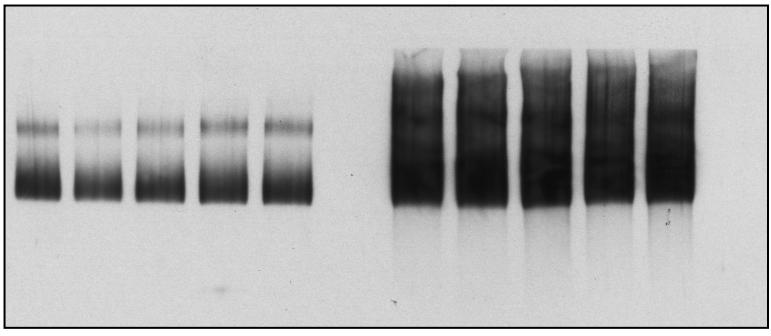

**A**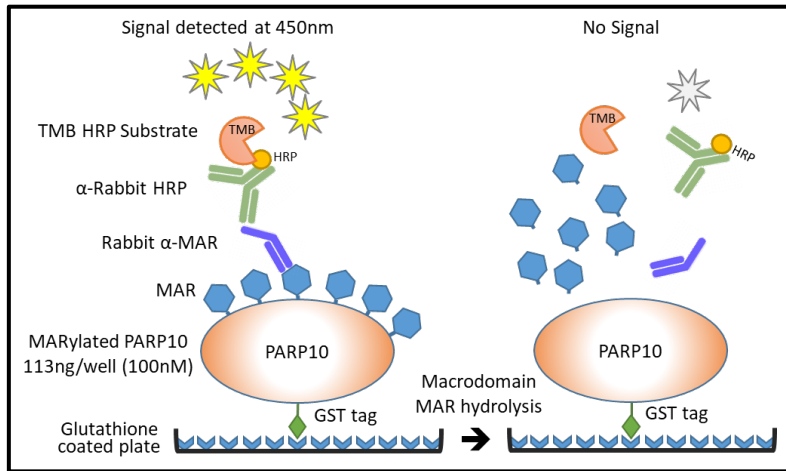**B**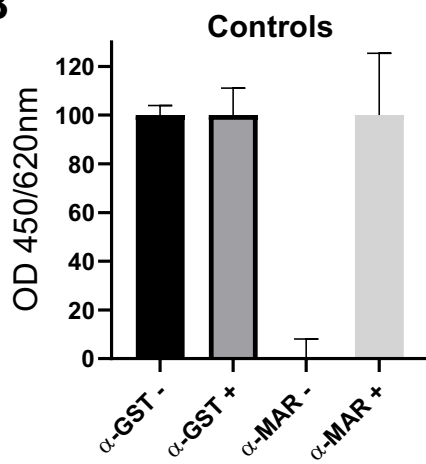**C**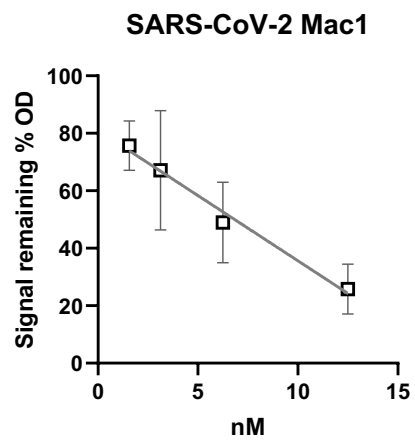

Source: http://biorxiv.org/content/10.1101/2020.05.11.089375v3.full.pdf
